1  
2  
3  
4  
5  
6  
7  
8  
9  
10  
11  
12  
13  
14  
15  
16  
17  
18  
19  
20  
21  
22  
23  
24  
25  
26  
27  
28  
29  
30  
31

**mRNP architecture in translating and stress conditions reveals an ordered pathway of mRNP compaction**

**Anthony Khong<sup>1,2</sup>, and Roy Parker<sup>1,2,3</sup>**

**<sup>2</sup>Department of Biochemistry  
& <sup>1</sup>Howard Hughes Medical Institute  
University of Colorado  
Boulder, CO 80303**

**3: Corresponding Author    Correspondence: [roy.parker@colorado.edu](mailto:roy.parker@colorado.edu)**

32 **ABSTRACT**

33

34 Stress granules (SGs) are non-translating mRNP assemblies that form during stress.

35 Herein, we use multiple smFISH probes for specific mRNAs to examine their SG recruitment

36 and spatial organization. We observed that ribosome run-off is required for SG entry with long

37 ORF mRNAs being delayed in SG accumulation, revealing SG transcriptome changes over time.

38 Moreover, mRNAs are ~20X compacted from an expected linear length when translating and

39 compact ~2 fold further in a stepwise manner beginning at the 5' end during ribosome run-off.

40 Surprisingly, the 5' and 3' ends of the examined mRNAs were separated in non-stress conditions,

41 but in non-translating conditions, the ends of AHNAK and DYNC1H1 mRNAs become close,

42 suggesting the closed-loop model of mRNPs preferentially forms on non-translating mRNAs.

43 These results suggest translation inhibition triggers a mRNP reorganization that brings ends

44 closer, which has implications for the regulation of mRNA stability and translation by 3' UTR

45 elements and the poly(A) tail.

46

47

48

49

50

51

52

53

54

55

56

57

58

59

60

61

62

63

## 64 INTRODUCTION

65 Stress granules (SGs) are transient membraneless organelles of non-translating mRNA-  
66 protein complexes (RNPs) that form when translation is limited (Buchan and Parker, 2009; Panas  
67 et al., 2016; Protter and Parker, 2016). SGs are important because they are a cellular marker for  
68 translation status, play a role in the stress response (Kedersha et al., 2013), and mutations that  
69 inhibit SG disassembly or clearance are implicated in several degenerative diseases such as  
70 amyotrophic lateral sclerosis (ALS) and multisystem proteinopathy (Buchan et al., 2013; Dewey  
71 et al., 2012; Kim et al., 2013; Li et al., 2013; Mackenzie et al., 2017; Ramaswami et al., 2013).  
72 Moreover, the study of SGs may provide new insights into the assembly, organization, and  
73 functions of other non-membrane bound RNA bodies such as the nucleolus, Cajal bodies,  
74 paraspeckles, and processing bodies.

75 SGs are enriched for mRNAs that are long and poorly translated (Khong et al., 2017;  
76 Namkoong et al., 2018). This suggests a model wherein long mRNPs that exit translation during  
77 stress form interactions with other long non-translating mRNPs leading to the formation of SGs.  
78 Some interactions between mRNAs that promote SG formation are between mRNA binding  
79 proteins that are thought to provide cross-links between individual mRNAs and thereby enhance  
80 SG assembly (reviewed in Protter and Parker, 2016). However, intermolecular RNA-RNA  
81 interactions can contribute to SG formation and to defining the SG transcriptome, which is  
82 suggested by the observation that self-assembly of RNA *in vitro* can largely recapitulate the  
83 yeast SG transcriptome (Van Treeck et al., 2018). An unresolved issue is the relative timing of  
84 mRNAs exiting translation, how translation affects the organization of the mRNP, and the timing  
85 of mRNAs accumulating in SG.

86           The timing of SG formation and the enrichment of long mRNAs in SGs creates a  
87    conundrum. This is because SGs form within the first 10-15 minutes after the addition of  
88    arsenite (Kedersha et al., 2000; Wheeler et al., 2016), yet mRNAs with long open reading frame  
89    (ORF) such as the SG-enriched mRNA AHNAK and DYNC1H1 (ORF >10 kb) (Khong et al.,  
90    2017) require at least 15 minutes for ribosome run-off once translation initiation is blocked. One  
91    possibility is that these long mRNAs can accumulate in SGs once a portion of their ORF is  
92    exposed and devoid of ribosomes, even if ribosomes near the 3' end of the ORF are still  
93    elongating. Another possibility is that elongating ribosomes are removed from these mRNAs  
94    without having to reach the termination, perhaps by a mechanism analogous to ribosome quality  
95    control (Brandman and Hegde, 2016; Brandman et al., 2012; Chiabudini et al., 2014; Harigaya  
96    and Parker, 2010; Shoemaker et al., 2010; Shoemaker and Green, 2012). Finally, it is also  
97    possible that mRNAs with long ORF are slower at getting to SGs, which would require the SG  
98    transcriptome to change over time.

99           To examine how mRNAs exit translation and enter SGs, we used multiple smFISH  
100    probes for specific mRNAs to examine the timing of when those mRNAs enter SGs, and their  
101    spatial organization, which revealed key aspects of mRNA targeting to SGs. First, complete  
102    ribosome run-off is required for mRNAs to enter SGs with mRNAs with long ORFs being  
103    delayed in SG accumulation. This demonstrates that SG transcriptome changes over time. We  
104    also observed that mRNAs are compacted from an expected linear length when translating, and  
105    compact even further in a step-wise manner due to ribosome run-off. We do not see evidence for  
106    the closed loop model of mRNP organization with the mRNAs examined while they are engaged  
107    in translation, although the distance between the 5' and 3' ends of long mRNAs shrinks  
108    disproportionally compared to the rest of the mRNAs when mRNAs are untranslated. We

109 suggest the possibility that the closed loop structure of mRNPs preferentially forms on non-  
110 translating mRNPs.

111

## 112 **RESULTS**

113

### 114 **mRNAs with long ORF are recruited slower to SGs than mRNAs with shorter ORF**

115 To determine the relationship between SG assembly and the recruitment of mRNAs with  
116 long ORF, we measured when several SG-enriched mRNAs (Khong et al., 2017) with various  
117 ORF lengths were recruited to SGs in cells treated with arsenite for 15', 30', 45', and 60' by  
118 smFISH. These include AHNAK, DYNC1H1, NORAD, PEG3, ZNF704, CDK6, and NORAD  
119 RNAs. AHNAK and DYNC1H1 mRNAs have long ORF (~17.5kb and 14kb respectively), while  
120 the PEG3 and ZNF704 mRNAs have shorter ORF (~4.7kb, 1.2kb respectively). The CDK6  
121 mRNA is valuable since it has a short ORF (~1 kb), but has a very long 3' UTR (~ 10 kb),  
122 allowing us to distinguish effects of the overall transcript length from ORF length. We also  
123 examined when a lincRNA, NORAD, is recruited to SGs. The predicted ribosome run-off times  
124 for these mRNAs once translation initiation is blocked are shown in Table 1. We performed  
125 these experiments in U-2 OS cells, where arsenite induces robust eIF2 $\alpha$  phosphorylation, an  
126 approximate marker for when translation initiation is inhibited, at ~8' (Wheeler et al., 2016).

127 A key result was that individual RNAs accumulated in SGs at different times in a manner  
128 correlated with the length of their ORF. Specifically, we observed that when cells were stressed  
129 for 30 minutes with NaAsO<sub>2</sub>, the AHNAK and DYNC1H1 mRNAs with long ORFs were  
130 minimally recruited to SGs (12%) (Figure 1A, B, Supplemental Figure 1). In contrast, RNAs  
131 with shorter ORF or no ORF were recruited to a greater degree (39-55%) at 30 minutes (Figure  
132 1A, B, Supplemental Figure 1). At 60 minutes, all the examined SG-enriched RNAs have  
133 reached their maximal level of enrichment in SGs (Figure 1A, B, Supplemental Figure 1). These  
134 results suggest the mRNA composition of SGs changes over time during arsenite stress and

135 although mRNAs with longer ORF are highly enriched in SGs (Khong et al., 2017), they  
136 accumulate slower.

137         Two additional observations suggest the difference in the timing of mRNA recruitment to  
138 SGs is due to elongating ribosomes. First, treatment of U-2 OS cells with arsenite and  
139 puromycin, which releases all elongating ribosomes from mRNAs, causes the AHNAK and  
140 DYNC1H1 mRNAs to be recruited to SGs at earlier times (Figure 1A, C, Supplemental Figure  
141 2). Second, treatment of U-2 OS cells after 30 minutes of arsenite exposure with cycloheximide,  
142 which traps elongating ribosomes on mRNAs, stops the accumulation of all RNAs in SGs  
143 (Figure 1A, D, Supplemental Figure 3).

144

#### 145 **AHNAK and DYNC1H1 mRNPs are generally compact under non-stress conditions**

146         In other work, we had observed that during stress the 5' and 3' ends of the AHNAK  
147 mRNA were often close together (Moon et al., 2018). Similar compaction of three other mRNAs  
148 under a variety of stress conditions have been observed (Srivathsan et al., 2018). To examine the  
149 overall architecture of mRNAs during normal and stress conditions, and how it related to mRNA  
150 entry into SG, we utilized smFISH probes to the 5' end, the 3' end, and throughout the middle of  
151 the AHNAK and DYNC1H1 mRNAs (Figure 2A, Supplemental Figure 4A). We first used these  
152 probes on unstressed cells where mRNAs are engaged in translation. We measured the distances  
153 between the center of the signal for each probe in three dimensions (see Methods), which  
154 allowed us to determine the distribution of spacing for these probe sets on individual mRNA  
155 molecules.

156         We discovered both AHNAK and DYNC1H1 mRNAs are more compact than expected  
157 from linear or hairpin models of translating mRNPs (Figure 2B, Supplemental Figure 4B) with

158 most distances between different segments of AHNAK mRNPs being less than 300 nm (Figure  
159 2B, C). The distances between the 5' and 3' ends of AHNAK mRNAs are usually larger (median  
160 ~ 200 nm) than the distances between 5' end and middle (median ~ 150 nm) or the 3' end and  
161 middle of AHNAK mRNPs (median ~ 150 nm). These distance measurements are much shorter  
162 than expected from the AHNAK mRNA contour length (5.4  $\mu$ m), or from a possible polysome  
163 hairpin, which would be approximately 2.7  $\mu$ m. We estimate the degree of compaction for the  
164 AHNAK mRNA relative to its contour length is about 27-fold (using the median distance  
165 between the 5' and 3' ends compared to the extended contour length) or 18-fold (using the  
166 median distance between one end and the middle relative to half the contour length). We  
167 obtained similar results for the DYNC1H1 mRNA with the median compaction relative to  
168 DYNC1H1 mRNA contour length estimated to be between 21- or 12-fold (Supplemental Figure  
169 4B, C). Similar compaction values were also observed for three other long mRNAs in  
170 translating conditions by Srivathsan et al., 2018. These results show that at least these long  
171 mRNAs are not in an extended conformation even when engaged in translation and suggest  
172 possible mechanisms of mRNA compaction (see discussion).

173

#### 174 **AHNAK and DYNC1H1 mRNPs compact further under stress conditions**

175 A similar analysis during stress conditions revealed that the distances between all three  
176 smFISH spots for AHNAK and DYNC1H1 mRNAs shrink considerably under arsenite-treated  
177 conditions (Figure 2D, E, Supplemental Figure 4D, E). For example, the median distance  
178 between the 5' and 3' ends, 5' end and middle, and 3' end and middle of AHNAK mRNAs are  
179 now ~ 80 nm, ~110 nm, and ~ 90 nm respectively. Relative to the contour length, the median  
180 compaction of AHNAK mRNAs in U-2 OS cells treated with arsenite is ~ 67.5- or 27-fold;



181 ~67.5-fold if we measure the compaction by dividing the median end-to-end distances to the  
182 contour length and ~27-fold if we measure the compaction by dividing the median end-to-middle  
183 distances to half the contour length. Similar compaction values were also seen with DYNC1H1  
184 mRNAs (Supplemental Figure 4D, E). The distances between all three smFISH spots for  
185 AHNAK and DYNC1H1 mRNAs also shrink considerably in heat shock conditions compared to  
186 non-stressed U-2 OS cells, with similar compaction values (Figure 2F, G, Supplemental Figure  
187 4F, G). Thus, in multiple stresses that inhibit translation initiation, we and others (Srivathsan et  
188 al., 2018) observe enhanced mRNP compaction.

189

190 **Increased compaction of AHNAK and DYNC1H1 mRNPs under stress is a consequence of**  
191 **translational inhibition**

192 Since 80% of AHNAK and 53% of DYNC1H1 mRNAs are found in arsenite-induced  
193 SGs at 60' and similar numbers were seen for heat shock-induced SGs at 60' (Khong et al.,  
194 2017), we expect the compaction measurements for AHNAK and DYNC1H1 mRNAs are  
195 reflective of AHNAK and DYNC1H1 mRNAs found inside SGs. Due to technical limitations,  
196 we have not been able to examine all three smFISH probes simultaneously with an SG marker.  
197 However, smFISH staining indicates most AHNAK and DYNC1H1 mRNAs tend to cluster  
198 during stress as expected by their strong enrichment in SG (Figure 2D, F, Supplemental Figure  
199 4D, F). This suggests most AHNAK and DYNC1H1 mRNPs form compact assemblies inside  
200 SGs during a stress response.

201 In principle, the increased compaction of AHNAK and DYNC1H1 mRNPs in SGs might  
202 be a consequence of translation inhibition and/or a consequence of increased macromolecular  
203 crowding possibly occurring inside SGs compared to the cytosol. We performed two analyses to

204 distinguish these possibilities. First, we measured the distances between the 5' and 3' ends of  
205 AHNAK and DYNC1H1 mRNPs inside and outside SGs (Figure 3E). We observed that the  
206 distances between the 5' and 3' ends of AHNAK and DYNC1H1 mRNPs showed a similar  
207 distribution inside and outside SGs (Figure 3E), consistent with the increased compaction being  
208 independent of SG accumulation.

209 In a second experiment, we examined AHNAK and DYNC1H1 mRNPs organization by  
210 smFISH when U-2 OS cells were treated with puromycin (Figure 3A-D). Puromycin leads to  
211 release of elongating ribosomes but does not lead to SG assembly, perhaps because translation  
212 initiation is ongoing and even partial ribosome engagement appears to block mRNA  
213 accumulation in SG (see below). We observed puromycin is sufficient to lead to increased  
214 compaction of the AHNAK and DYNC1H1 mRNPs (Figure 3B, D), even though SG do not  
215 form. Similar compaction of the MDN1, POLA1, and PRPF8 mRNPs with puromycin treatment  
216 have been reported in HEK293T cells (Srivathsan et al., 2018). These results argue that mRNP  
217 compaction is not due to increased macromolecular crowding found inside SGs and instead is a  
218 consequence of translational inhibition and the loss of elongating ribosomes.

219

### 220 **Compaction of mRNPs during stress proceeds in a 5' to 3' direction**

221 Since mRNP compaction is likely a consequence of translation inhibition, we  
222 hypothesized that the compaction of AHNAK and DYNC1H1 mRNPs under stress is mediated  
223 by intramolecular interactions formed within the ORF of mRNAs in the absence of ribosomes. If  
224 this model is accurate, mRNP compaction will begin at the 5' end of the transcript as elongating  
225 ribosomes translocate towards the 3' end of the transcript once translation initiation is inhibited.  
226 This model predicts that the 5' end to the middle of the mRNA will compact first as elongating

227 ribosomes move down the mRNA in the absence of new translation initiation, followed by a  
228 subsequent compaction of the middle and the 3' end of AHNAK mRNPs as ribosomes finally exit  
229 the ORF and terminate translation. To examine this possibility, we stressed U-2 OS cells for 10,  
230 20, and 30 minutes with 500  $\mu$ M arsenite and examined the distances between the different  
231 regions of the AHNAK mRNA by smFISH (Figure 4).

232         Qualitatively, we observed the distance between 5' end and the middle are closer at 20  
233 minutes after addition of arsenite, at which time the distance between the 5' end and 3' end or the  
234 middle and the 3' end are still separated (Figure 4B). Quantitatively, the distances between the  
235 5' end and the middle shrink considerably at 20 minutes (Figure 4D), which correlates with the  
236 time ribosomes should be beginning to exit the 5' portion of the coding region since it takes 8  
237 minutes after addition of arsenite to maximize eIF2 $\alpha$  phosphorylation in U-2 OS cells (Wheeler  
238 et al., 2016). In contrast, the shrinkage in distances for the 5' end to the 3' end or the middle to  
239 the 3' end is only noticeable at 30 minutes (Figure 4C, E). These observations are consistent with  
240 the model that intramolecular folding of the mRNA, either through RNA-RNA interactions or  
241 protein binding, as ribosomes expose the coding region, leads to the increased compaction of the  
242 non-translating mRNA.

243

#### 244 **The 5' and 3' ends of the AHNAK and DYNC1H1 mRNPs become closer when non-** 245 **translating**

246         Under non-stress conditions, we notice the 5' to 3' end distances of AHNAK and  
247 DYNC1H1 mRNPs are larger than one would expect base on specific models of mRNP  
248 organization such as the closed-loop model of translation (median ~200 nm) (see discussion).  
249 This suggests that the closed-loop model of translation either does not occur on these mRNAs or

250 is transient. However, we noticed that the 5' and 3' ends of the AHNAK mRNP and DYNC1H1  
251 mRNPs shrink disproportionately under non-translating conditions and reach a median distance  
252 between the ends of ~50 nm (Figure 2E, G, Figure 3B, D, Supplemental Figure 4E, G) These  
253 results suggest stress triggers a reorganization of mRNPs that disproportionately brings the 5' and  
254 3' ends closer together.

255 To further examine the relationship between the 5' and 3' ends of these mRNAs, we  
256 measured the angles between the middle smFISH spots to the 5' and 3' ends for AHNAK and  
257 DYNC1H1 smFISH spots (Figure 5A). We observed in non-stress conditions, the angles can  
258 vary considerably, but most angles are less than 90 degrees with a median angle of ~ 60 degrees  
259 (Figure 5B, C). This observation suggests that these mRNAs are not linear in cells and, on  
260 average, the 5' end is closer to the 3' end than expected by chance, perhaps due to features of  
261 polysomes or RNA binding proteins (see discussion).

262 A striking result was that under non-translating conditions, most angles are now less than  
263 45 degrees with a median angle of 20 degrees (Figure 5B, C). Since the mRNAs are now  
264 compact under these conditions, we were concerned that the small spacing between the smFISH  
265 spots might skew this analysis. Given this, we performed a second analysis where we limited  
266 our analysis to specific mRNAs where the total distance between the 5' end to middle and the  
267 middle to 3' end is between 0.3  $\mu\text{m}$  to 0.6  $\mu\text{m}$  with the goal of increasing our ability get an  
268 accurate angle measurement. This analysis also showed a dramatic reduction in the angle  
269 between the 5'-middle-3' signals (Supplemental Figure 5). This provides a second line of  
270 evidence that when mRNAs exit translation the distance between the 5' and 3' ends of AHNAK  
271 and DYNC1H1 mRNPs is notably compacted, perhaps due to the polymer nature of the mRNA  
272 (see discussion).

273 **DISCUSSION**

274 **mRNAs need to exit translation completely before entering SGs**

275 We present several observations that indicate mRNAs must be completely disengaged  
276 from translating ribosomes before entering SGs (Figure 6). First, mRNAs with long ORF are  
277 slower at recruitment to SGs than mRNAs with short ORF (Figure 1A, B, Supplemental Figure  
278 1). Second, recruitment of mRNAs with long ORF to arsenite-induced SGs is quicker when  
279 puromycin is added, which will rapidly disengage elongating ribosomes (Figure 1A, C,  
280 Supplemental Figure 2). Third, addition of cycloheximide to cells treated with arsenite for 30  
281 minutes inhibits additional recruitment of RNA to SGs (Figure 1A, D, Supplemental Figure 3),  
282 which indicates that the continued accumulation of AHNAK and DYNH1C1 mRNAs require  
283 ribosome run-off. For mRNAs with long ORF such as AHNAK and DYNH1C1, a large amount  
284 of the ORF will be exposed by 30 minutes of stress, yet these mRNAs have only partially  
285 accumulated in SG. This argues that mRNAs must fully disengage from elongating ribosomes  
286 before stable accumulation in SGs. Additional evidence in support of this model comes from  
287 single-molecule experiments that show mRNAs engaged with ribosomes can only form a  
288 transient association with SG and do not enter a stable association, which can be seen with non-  
289 translating mRNAs (Moon et al., 2018).

290 It is an unsolved mystery why complete ribosome disengagement is required for stable  
291 association of mRNAs with SG. One possibility is that the mRNA association with the  
292 translation machinery increases the presence of helicases and/or protein chaperones that prevent  
293 or disengage interactions between the translating mRNP and SG. Alternatively, it may be  
294 energetically unfavorable for an 80S ribosome and its associated factors to enter the altered

295 environment of an SG, either because of energetic costs of changes in solvation, or because the  
296 mesh size of an SG is smaller than an assembled 80S ribosome.

297

### 298 **mRNPs are compact in both translating and non-translating states**

299 We present several observations that demonstrate mRNAs are compacted >10-fold  
300 relative to its contour length even when it is translating. First, under no stress conditions, the  
301 median distances between the 5' and 3' end of AHNAK and DYNC1H1 mRNPs are roughly  
302 ~150 nm (Figure 2C, Supplemental Figure 4C). Relative to the AHNAK and DYNC1H1  
303 mRNAs contour length, 5.6 and 4.2  $\mu\text{m}$  respectively, this is ~27- and ~21-fold compaction  
304 respectively. Second, the median distances between the 5' and mid or 3' and mid of AHNAK  
305 and DYNC1H1 are roughly ~100 nm (Figure 2C, Supplemental Figure 4C). Relative to half of  
306 its contour length, this is ~18- and ~12-fold compaction. Third, we notice the angles between the  
307 middle and the 5' and 3' end of AHNAK and DYNC1H1 mRNPs are usually less than 90 degrees  
308 (Figure 5B, C, Supplemental Figure 5B, C) which also suggests significant compaction of the  
309 ends relative to its linear length. Similar results are seen for the MDN1, POLA1, and PRPF8 in  
310 HEK293T mRNAs in HEK293 cells indicating this is a general phenomenon (Srivathsan et al.,  
311 2018).

312 We suggest two mechanisms account for the compaction of mRNAs during non-stress  
313 conditions. First, we suggest transient folding of the ORF region between elongating ribosomes  
314 compacts mRNAs (Figure 6). The average inter-ribosome distance is estimated to be 150  
315 nucleotides in yeast and 189 in mammalian cells (Arava et al., 2003; Hendrickson et al., 2009),  
316 or from single-molecule translation assays in mammalian cells, the average inter-ribosomal is  
317 estimated to be between 200-900 nucleotides (Morisaki et al., 2016; Wang et al., 2016; Wu et

318 al., 2016; Yan et al., 2016). Additionally, for DYNC1H1 mRNPs specifically, it is estimated that  
319 on average each DYNC1H1 mRNA has about 7 ribosomes (Pichon et al., 2016). Since a  
320 ribosome footprint is ~30 nucleotides (Steitz, 1969; Wolin and Walter, 1988), this suggests most  
321 of the nucleotides in the ORF are not covered with ribosomes. We estimate ~80-97% of the ORF  
322 nucleotides for most mRNAs, and ~98% for DYNC1H1 mRNA, are not engaged with  
323 ribosomes. Therefore, the ORF region can form significant intramolecular interactions with  
324 itself, or with the 5' and 3' UTRs. Supporting this model, an extensive physical association  
325 between the 3'UTR and the ORF has been reported for mRNAs (Eldad et al., 2008). Besides  
326 intramolecular interactions, the folding of the ORF region may also be promoted by RNA-  
327 binding proteins or complexes by connecting different ORF regions of the mRNA.

328         A second mechanism of compacting translating mRNAs may arise from the architecture  
329 of polysomes since the path a mRNA takes within each ribosome is curved (Agrawal et al.,  
330 1996). Therefore, by its nature, a translating mRNA would be more compact compared to its  
331 contour length. Indeed, instances of circular, spiral, rosette, staggered line, double-row and  
332 helical polysomes has been observed by traditional EM or more advanced cryo-EM and cryo-ET  
333 methods, all of which would compact the overall shape of the mRNA (Afonina et al., 2014;  
334 Afonina et al., 2015; Afonina Zh et al., 2013; Brandt et al., 2010; Brandt et al., 2009; Daneholt et  
335 al., 1977; Kopeina et al., 2008; Madin et al., 2004; Myasnikov et al., 2014; Palade, 1955; Viero  
336 et al., 2015; Warner et al., 1962; Wettstein et al., 1963; Yazaki et al., 2000).

337         We, and others (Adivarahan et al., 2017), observe under stress conditions when mRNAs  
338 stop translating, mRNPs compact further (Figure 6). Specifically, the distances between the 5' to  
339 3'ends, 5'end to the middle and 3'end to the middle are smaller for AHNAK and DYNC1H1  
340 mRNAs under a variety of conditions that cause mRNAs to disengage from elongating

341 ribosomes, such as arsenite, heat-shock, and puromycin (Figure 2, Figure 3, Supplemental Figure  
342 4). This additional compaction appears a consequence of translational shutoff and not a  
343 consequence of being inside SGs for two reasons (Figure 6). (1) Compaction is similar inside and  
344 outside SGs (Figure 3E). And (2) puromycin also compacts AHNAK and DYNC1H1 mRNPs  
345 without inducing SG (Figure 3A-D). The most straightforward interpretation for increased  
346 mRNP compaction during stress is mRNAs forming increased intra-molecular interactions in the  
347 absence of translating ribosomes. This interpretation is supported by the fact that the compaction  
348 precedes temporally in a 5' to 3' manner that correlates with ribosomes transiting towards the  
349 3' end of AHNAK mRNAs after addition of arsenite (Figure 4).

350

### 351 **The spatial relationship between the 5' and 3' ends change with stress**

352 We observed mRNPs are reorganized during stress in a manner where the distances  
353 between the ends are now smaller than the distances between the ends to the middle for AHNAK  
354 and DYNC1H1 mRNAs (Figure 6). Specifically, the median distance between the 5' and 3' end  
355 is ~ 50 nm during stress while the median distance between the 5' end to the middle or 3' end to  
356 the middle is ~ 100 nm (Figure 2E, G, Figure 3B, D, Supplemental Figure 4E, G). This is  
357 different with respect to translating mRNPs; the median distance between the ends (~ 200 nm) is  
358 larger than the median distance between the 5' end or 3' end to the middle (~150 nm) (Figure 2C,  
359 Supplemental Figure 4C). In support of the 5' and 3' ends being in proximity under stress, we  
360 also observed the angles between the middle and the ends of AHNAK and DYNC1H1 mRNAs  
361 are now considerably smaller under stress (Figure 5B, C, Supplemental Figure 5B, C).

362 We suggest two possible mechanisms for why the 5' and 3' ends may enter into  
363 proximity during stress. One hypothesis is that the closed-loop conformation is a non-stable



364 state during translation and that in the absence of translation, the closed loop confirmation can  
365 form through interactions of eIF4E, eIF4G, and PABP where eIF4E binds to the m<sup>7</sup>G cap,  
366 PABP binds to poly(A) tail, and eIF4G binds to both eIF4E and PABP (Hinnebusch and Lorsch,  
367 2012) (Figure 6). Alternatively, or in addition, the 5' and 3' ends of mRNPs may be close during  
368 stress because of an intrinsic property of “naked” RNAs to fold in a manner that brings the ends  
369 in proximity. Several computation studies suggest the ends of mRNAs are close (<10 nm) for  
370 RNAs in solution (Clote et al., 2012; Fang et al., 2011; Yoffe et al., 2011). Moreover, an *in vitro*  
371 FRET-based assay indicates for all eleven mRNAs examined, the distance between the 5' and 3'  
372 ends are less than 10 nm (Lai et al., 2018). This distance is significantly smaller than one would  
373 expect if it these RNAs were behaving as a random coil in solution (Lai et al., 2018). Therefore,  
374 under stress conditions, if most mRNAs are now exposed and can form significant  
375 intramolecular interactions, its properties as a polymer might promote the interaction of the 5'  
376 and 3' ends.

377 To consider whether there could be a direct interaction between the 5' and 3' ends of  
378 mRNAs at the distances estimated from our smFISH analysis, we estimated what distance we  
379 would observe by smFISH for a classic eIF4E-eIF4G-PABP closed loop structure (Supplemental  
380 Figure 6). In a closed-loop model with PABP interacting with eIF4G, the distance between the  
381 m<sup>7</sup>G-cap and the poly(A) tail ends should be less than 20 nm since the diameter of an average  
382 protein is about ~5 nm (Milo et al., 2010). We estimate the distance between the m<sup>7</sup>G-cap and  
383 the last nucleotide that precedes the poly(A) tail should be ~50 nm, since the average poly(A)-  
384 tail of a mammalian mRNA is < 100 nucleotides (Chang et al., 2014), and when fully extended is  
385 ~30 nm in length (Milo et al., 2010). Finally, given where the 5' and 3' end smFISH probes bind  
386 on AHNAK and DYNC1H1 mRNAs and provided if the overall compaction of AHNAK and

387 DYNC1H1 mRNAs is similar at the ends (>20 fold), we estimate a distance less than 80-65 nm  
388 between 5'end and 3'end of AHNAK and DYNC1H1 smFISH spots respectively could support a  
389 closed-loop conformation (Supplemental Figure 6). Although these calculations should be taken  
390 as ballpark estimates, this would suggest that less than 20% of AHNAK and DYNC1H1  
391 translating mRNPs have distances between the ends supporting a closed-loop conformation. In  
392 contrast, during stress, when mRNAs exit translation, >50% of AHNAK and DYNC1H1  
393 mRNAs have distances that are consistent with the closed loop-conformation (Figure 2C, E, G,  
394 Figure 3B, D, Supplemental Figure 4C, E, G). Similar results have also been described for the  
395 MDN1, POLA1, and PRPF8 mRNAs (Adivarahan et al., 2017) suggesting this effect is not  
396 limited to the mRNAs we have examined. Thus, one mechanism for the shortened distance  
397 between the 5' and 3' ends during stress could be direct protein-protein interactions (Figure 6).

398         The observation that the distances between the ends of translating mRNPs are typically  
399 large (greater than 100 nm) is surprising with respect to many aspects of established RNA  
400 biology. For example, the closed loop model as discussed earlier but also for other 3'UTR  
401 regulatory elements that can affect processes occurring at the 5'UTR (e.g. miRNA-mediated  
402 translation initiation repression). Our observations suggest that this is not physically possible for  
403 translating mRNPs unless there is a large network of protein-protein interactions that connect the  
404 ends (>20 proteins since an average protein size is 5 nm). Alternatively, we hypothesize, based  
405 on observations derived from non-translating conditions, effects imparted by 3'UTR regulatory  
406 elements on processes at the 5'end will only occur when all translating ribosomes are released  
407 from the mRNA. If this is accurate, this suggests mRNAs that are being translated are likely  
408 unaffected by these 3'UTR regulatory elements. However, when mRNA loses all its translating  
409 ribosomes, most likely in a stochastic manner, these regulatory elements can now communicate

410 with the 5' end and affect mRNA fate. This leads to a model wherein 3' UTR elements can affect  
411 events at the 3' end of the mRNA, such as deadenylation, regardless of translation status, but the  
412 ability of the 3' UTR and poly(A) tail to influence events at the 5' mRNA end, such as  
413 translation initiation and decapping, would be more pronounced on mRNAs that have exited  
414 translation.

415

416

417

## 418 **Materials and Methods**

### 419 **U-2 OS growth conditions**

420 Human osteosarcoma U-2 OS cells (Kedersha et al., 2016), maintained in DMEM with  
421 high glucose, 10% fetal bovine serum and 1% penicillin/streptomycin at 37°C/5% CO<sub>2</sub>, were  
422 used in all experiments.

423

### 424 **Sequential immunofluorescence and single molecule FISH**

425 The protocol was performed as described previously (Khong et al., 2018; Khong et al.,  
426 2017). Briefly, U-2 OS cells were seeded on sterilized coverslips in 6-well tissue culture plates.  
427 At ~80% confluency, media was exchanged sixty minutes before experimentation with fresh  
428 media. Experimentation was performed as described in each figure. U-2 OS cells were treated  
429 with 500 μM NaAsO<sub>2</sub>, 10 μg/mL puromycin or 50 μg/mL cycloheximide as described. After  
430 stressing cells, the media was aspirated and the cells were washed with pre-warmed 1x PBS. The  
431 cells were then fixed with 500 μL 4% paraformaldehyde for ten minutes at room temperature.

432 After fixation, cells were washed twice with 1x PBS, permeabilized in 0.1% Triton X-  
433 100 1x PBS for five minutes, and washed once with 1x PBS. Coverslips were transferred to a  
434 humidifying chamber and cells were incubated in 5 μg/mL mouse α-G3BP1 antibody (ab56574,  
435 Abcam) in 1x PBS for sixty minutes at room temperature. Afterward, the coverslips were  
436 transferred to a 6-well plate and washed three times with 1x PBS. Coverslips were then  
437 transferred back to the humidifying chamber and incubated in goat α-mouse FITC-conjugated  
438 antibody in 1× PBS (1:1000 dilution ab6785, Abcam) for sixty minutes at room temperature. The  
439 coverslips were transferred to 6-well plate and washed three times with 1x PBS. Antibodies

440 binding to cells were fixed on cells by incubating coverslips with 500  $\mu$ L 4% paraformaldehyde  
441 for ten minutes at room temperature.

442 After immunofluorescence, smFISH was performed as described previously (Khong et  
443 al., 2018) using Biosearch Technologies Stellaris buffers (SMF-HB1-10, SMF-WA1-60, SMF-  
444 WB1-20). Specific smFISH probes were created using software designed by Biosearch  
445 Technologies ([https://www.biosearchtech.com/support/tools/design-software/stellaris-probe-](https://www.biosearchtech.com/support/tools/design-software/stellaris-probe-designer)  
446 [designer](https://www.biosearchtech.com/support/tools/design-software/stellaris-probe-designer)). smFISH probes that bind to AHNAK, DYNC1H1, NORAD, PEG3, ZNF704, and  
447 CDK6 mRNAs were designed previously (Khong et al., 2017; Moon et al., 2018). Newly  
448 designed smFISH probes include probes that bind to the middle of AHNAK mRNAs, and 5' end,  
449 middle and 3' end of DYNC1H1 mRNAs. The smFISH probes were made by conjugating 30 or  
450 60 DNA-oligos with ddUTP-Atto488, ddUTP-Atto550, or ddUTP-Atto633 as described in  
451 Gaspar et al., (2017).

452

### 453 **Imaging parameters**

454 Fixed stained U-2 OS cells were imaged using a wide-field DeltaVision Elite microscope  
455 with a 100x objective using a PCO Edge sCMOS camera with appropriate filters as described  
456 previously (Khong et al., 2018). At least thirty Z-sections (0.2  $\mu$ m step size) were captured for  
457 each image in order to capture the entire U-2 OS cell. Imaging parameters were adjusted to  
458 capture fluorescence within scope's dynamic range. After images were collected, the images  
459 were then deconvolved with built-in DeltaVision software as described previously (Khong et al.,  
460 2018).

461

### 462 **Image analysis**

463 All image analysis was performed using Bitplane Imaris image analysis software as  
464 described previously with the deconvolved images (Khong et al., 2018). To measure the fraction  
465 of smFISH spots in SGs in U-2 OS cells, please refer to Khong et al., 2018.

466 We quantified the distances between the 5' end, middle, and 3' end of AHNAK and  
467 DYNC1H1 mRNAs with the help of Bitplane Imaris Imaging Analysis software in the following  
468 manner. (1) First, we open the deconvolved DeltaVision images in Bitplane Imaris Imaging  
469 Analysis Software (see imaging parameters). Bitplane Imaris Imaging Analysis Software  
470 reassembles the Z-stack DeltaVision images in 3-D automatically. (2) Second, we mask all  
471 fluorescent signal coming from the nuclei of cells of an image using DAPI staining to define the  
472 nuclei. (3) Third, we applied the spot creation wizards to identify the 5' end, middle, and 3' end  
473 AHNAK and DYNC1H1 smFISH spots using these two following parameters: a fixed xy  
474 diameter spot size of 200 nm and a manually determined fluorescent quality threshold. Upon  
475 identification of smFISH spots, the spot creation wizard provides all x,y,z coordinates for the  
476 center of each smFISH spot in an excel spreadsheet. (4) Fourth, we exported the coordinates of  
477 all smFISH spots and computed the distances between all smFISH spots in different channels by  
478 applying the distance formula between two points in 3D-space. (5) Finally, we note the smallest  
479 distance between all smFISH spots of different channels. We assume the smallest distance is the  
480 distance between two regions of a single AHNAK or DYNC1H1 mRNA molecule.

481 With respect to angles, with the smallest distances between smFISH spots provided, we  
482 computed the angles between the middle smFISH spots to the 5' and 3' end smFISH spots by  
483 applying the law of cosines with three known sides. We only computed the angles when the  
484 smallest distance measured between the three smFISH spots (5' end, middle, and 3' end) can be  
485 attributed to all three smFISH spots.

486 **ACKNOWLEDGMENTS**

487           We would like to thank Nancy Kedersha and Paul Anderson for the U-2 OS cells. We  
488 would like to thank Anne Ephrussi for providing ddUTP-Atto633 and Evan Lester for making  
489 CDK6 smFISH probes. We would like to thank Carolyn Decker for DeltaVision training. We are  
490 grateful to Joe Dragavon for image analysis training (Bitplane Imaris Image Analysis Software).  
491 The imaging data analysis was performed at the CU Light Microscopy Core Facility and the  
492 BioFrontiers Institute Advanced Light Microscopy Core. We also like to thank Theresa Nahreini  
493 for cell culture facility training. All cell culture experiments conducted was at BioFrontiers Cell  
494 Culture Facility. Finally, we would like to thank Olke Uhlenbeck for helpful discussion. This  
495 work was funded by NIH grants GM045443 (R.P.) and the Howard Hughes Medical Institute  
496 (R.P.).

497

498

499

500

501

502

503

504

505

506

507

508

509 **Figure 1. mRNA recruitment to SGs is dependent on when ribosomes run-off elongation**  
510 **after translation inhibition.** (A) Representative smFISH images acquired for three different  
511 transcripts (AHNAK, DYNC1H1, and NORAD) for U-2 OS cells treated with 0.5 mM NaAsO<sub>2</sub>  
512 with or without 10 µg/mL puromycin for 30' or 60'. Cells were stained with nuclei (blue),  
513 G3BP1 antibody (green), and specific transcripts by smFISH (red). Scale bar: 1 µm (B) Fraction  
514 of specific RNA molecules found in SGs in U-2 OS cells stressed with 0.5 mM NaAsO<sub>2</sub> for 15',  
515 30', 45', and 60'. (C) Fraction of specific RNA molecules found in SGs in U-2 OS cells stressed  
516 with 0.5 mM NaAsO<sub>2</sub> and 10 µg/mL puromycin for 15', 30', 45', and 60'. (D) Fraction of  
517 specific RNA molecules found in SGs in U-2 OS cells stressed with 0.5 mM NaAsO<sub>2</sub> for 15',  
518 30', 45', and 60'. 50 µg/mL cycloheximide was added after cells were stressed for 30'. More  
519 than 500 RNAs were counted for each sample.

520  
521 **Figure 2. AHNAK mRNPs organization in non-stress and stress conditions.** (A) Cartoon  
522 schematic indicating where smFISH probes bind to AHNAK mRNAs. smFISH probes binding to  
523 the 5' ends, middle or 3' ends are labeled with distinct fluorophores and are false-colored red,  
524 blue, and green respectively. (B, D, and F) Left panels. Representative AHNAK smFISH images  
525 of U-2 OS cells that were (B) not stressed or (D) stressed with 0.500 mM NaAsO<sub>2</sub> for 60' or (F)  
526 heat shock at 42°C for 60'. U-2 OS cells were stained with AHNAK smFISH probes that bind  
527 specifically to the 5' end (false-colored red), middle (false-colored blue), and 3' end (false-  
528 colored green). Right panels. 3D rendering of smFISH spots by Bitplane Imaris imaging analysis  
529 software. Scale bar: 250 nm. (C, E, and G) Cumulative frequency graphs (in fractions) of  
530 smallest distances between 5' to 3' end smFISH spots (solid lines), 5' end to middle smFISH  
531 spots (dash lines), and middle to 3' end smFISH spots (dotted lines) in unstressed cells (black),  
532 0.500 mM NaAsO<sub>2</sub>-treated cells (green), and heat shock cells (red). More than 1000 smallest  
533 distances were quantified for each sample.

534  
535 **Figure 3. AHNAK and DYNC1H1 mRNPs compact when U-2 OS cells are treated with**  
536 **puromycin.** (A, C) Left panels. Representative AHNAK and DYNC1H1 smFISH images of U-2  
537 OS cells treated with 10 µg/mL puromycin for one hour. Cells were stained with smFISH probes  
538 that bind specifically to the 5' end (false-colored red), middle (false-colored blue), and 3' end  
539 (false-colored green) of AHNAK and DYNC1H1 mRNAs. Right panels. 3D rendering of  
540 smFISH spots by Bitplane Imaris imaging analysis software. Scale bar: 250 nm. (B, D)  
541 Cumulative frequency graphs (in fractions) of smallest distances between 5' to 3' end smFISH  
542 spots (solid lines), 5' end to middle smFISH spots (dash lines), and middle to 3' end smFISH  
543 spots (dotted lines) in unstressed cells (black) and 10 µg/mL puromycin-treated cells (blue).  
544 More than 1100 smallest distances were quantified for each sample. (E) Cumulative frequency  
545 graph (in fractions) of smallest distances between 5' to 3' end smFISH spots (solid lines) inside  
546 and outside SG in U-2 OS cells stressed with 60' 0.500 mM NaAsO<sub>2</sub>. More than 500 smallest  
547 distances were quantified. The analysis was performed with the experimental results as shown in  
548 Figure 2B-C.

549  
550 **Figure 4. Distances between the 5' end and middle AHNAK smFISH spots shrink first after**  
551 **the addition of NaAsO<sub>2</sub>.** (A) Cartoon schematic illustrating where smFISH probes bind to  
552 AHNAK mRNAs. smFISH probes binding to the 5' end, middle or 3' end are labeled with distinct  
553 fluorophores and are false-colored as red, blue, and green respectively. (B) Representative  
554 AHNAK smFISH image of U-2 OS cells that were not stressed or stressed with 0.5 mM NaAsO<sub>2</sub>



555 for 10, 20 and 30 minutes. Scale bar: 1  $\mu\text{m}$ . (C-E) Cumulative frequency graphs (in fractions) of  
556 smallest distances between (C) 5' to 3' end smFISH spots, (D) 5' end to middle smFISH spots  
557 and (E) middle to 3' end smFISH spots in unstressed U-2 OS cells or 0.5 mM NaAsO<sub>2</sub>-treated U-  
558 2 OS cells for 5-30 minutes. More than 800 smallest distances were quantified for each sample.

559

560 **Figure 5. Translation inhibition with puromycin, NaAsO<sub>2</sub> or heat shock in U-2 OS cells**  
561 **disproportionally shrink the distances between the 5' and 3' ends relative the middle of**  
562 **AHNAK and DYNC1H1 mRNPs (A)** Cartoon schematic indicating the angles that were  
563 measured in (B, C). Histograms illustrating the relative frequency (fractions) of angles from  
564 middle smFISH spots to 5' end and 3' end smFISH spots of (B) AHNAK and (C) DYNC1H1  
565 mRNAs in unstressed (black line), puromycin-treated (blue), NaAsO<sub>2</sub>-treated (green), or heat  
566 shocked (red) U-2 OS cells. The histograms were generated by binning every 15°. More than 850  
567 angles were quantified for each sample.

568

569 **Figure 6. Model depicting mRNP compaction and mRNA recruitment to SGs.** Under non-  
570 stress conditions, mRNPs are engaged in translation. Relative to its contour length, significant  
571 compaction was observed. During early stages of stress, ribosomes will migrate towards the  
572 3' end of mRNAs and mRNAs start to compact at the 5' end, most likely due to intramolecular  
573 interactions formed. When mRNA exits translation, the mRNP compacts further and the ends are  
574 disproportionally close. One hypothesis is the closed-loop conformation is re-established. Some  
575 of these mRNPs, preferentially long mRNAs, start to accumulate in SGs via intermolecular  
576 interactions formed with other mRNPs.

577

578 **Supplemental Figure 1. When mRNAs are recruited SGs is correlated with ORF length in**  
579 **U-2 OS cells.** Representative smFISH images acquired for six different transcripts (AHNAK,  
580 DYNC1H1, NORAD, PEG3, ZNF704, CDK6) for U-2 OS cells treated with 0.5 mM NaAsO<sub>2</sub> for  
581 15, 30, 45, or 60 minutes. Cells were stained with Nuclei (false-colored blue), G3BP1 (false-  
582 colored green), and specific transcripts by smFISH (false-colored red).

583

584 **Supplemental Figure 2. mRNAs with long ORF are recruited to SGs quicker with**  
585 **puromycin in U-2 OS cells.** Representative smFISH images acquired for six different transcripts  
586 (AHNAK, DYNC1H1, NORAD, PEG3, ZNF704, CDK6) for U-2 OS cells treated with 10  
587  $\mu\text{g}/\text{mL}$  puromycin and 0.5 mM NaAsO<sub>2</sub> for 15, 30, 45, or 60 minutes. Cells were stained with  
588 Nuclei (false-colored blue), G3BP1 (false-colored green), and specific transcripts by smFISH  
589 (false-colored red).

590

591 **Supplemental Figure 3. Cycloheximide added at 30 minutes after treating U-2 OS cells with**  
592 **NaAsO<sub>2</sub> impedes recruitment of mRNA to SGs.** Representative smFISH images acquired for  
593 six different transcripts (AHNAK, DYNC1H1, NORAD, PEG3, ZNF704, CDK6) for U-2 OS  
594 cells treated with 0.5 mM NaAsO<sub>2</sub> for 15, 30, 45, or 60 minutes with 50  $\mu\text{g}/\text{mL}$  cycloheximide  
595 added at 30 minutes. Cells were stained with Nuclei (false-colored blue), G3BP1 (false-colored  
596 green), and specific transcripts by smFISH (false-colored red).

597

598 **Supplemental Figure 4. DYNC1H1 mRNPs organization in non-stress and stress**  
599 **conditions.** (A) Cartoon schematic indicating where smFISH probes bind to DYNC1H1  
600 mRNAs. smFISH probes binding to the 5' ends, middle or 3' ends are labeled with distinct

601 fluorophores and are false-colored red, blue, and green respectively. **(B, D, and F)**  
602 Representative DYNC1H1 smFISH images of U-2 OS cells that were **(A)** not stressed or **(C)**  
603 stressed with 0.500 mM NaAsO<sub>2</sub> for 60' or **(E)** heat shock at 42°C for 60'. Cells were stained  
604 with DYNC1H1 smFISH probes that bind specifically to the 5' end (false-colored red), middle  
605 (false-colored blue), and 3' end (false-colored green). **(B, D, and F)** Cumulative frequency  
606 graphs (in fractions) of smallest distances between 5' to 3' end smFISH spots (solid lines), 5'  
607 end to middle smFISH spots (dash lines), and middle to 3' end smFISH spots (dotted lines) in  
608 unstressed cells (black), 0.500 mM NaAsO<sub>2</sub>-treated cells (green), and heat shock cells (red).  
609 More than 1000 smallest distances were quantified for each sample.

610  
611 **Supplemental Figure 5. Translation inhibition with puromycin, NaAsO<sub>2</sub> or heat shock in**  
612 **U-2 OS cells disproportionately shrink the distances between the 5' and 3' ends relative the**  
613 **middle of AHNAK and DYNC1H1 mRNPs. (A)** Cartoon schematic indicating the angles that  
614 were measured in **(B, C)**. Analysis was restricted to distances between 0.3 μm to 0.6 μm between  
615 5'-to-middle and middle to 3'-end smFISH spots. Histograms illustrating the relative frequency  
616 (fractions) of angles from middle smFISH spots to 5' end and 3' end smFISH spots of **(B)**  
617 AHNAK and **(C)** DYNC1H1 mRNAs in unstressed (black line), puromycin-treated (blue),  
618 NaAsO<sub>2</sub>-treated (green), or heat shocked (red) U-2 OS cells. The histograms were generated by  
619 binning every 15°. More than 200 angles were quantified for each sample.

620  
621 **Supplemental Figure 6. Distances less than 80 nm and 65 nm between 5' and 3' end**  
622 **smFISH spots for AHNAK and DYNC1H1 mRNAs respectively are consistent with the**  
623 **closed-loop translation model.** We estimate the distances between eIF4E, eIF4G, and PABP  
624 will be less than 20 nm since an average protein length is 5 nm. With respect to the poly(A) tail  
625 length, we estimate the distance between the last nucleotide prior to poly(A) tail and the last A  
626 on the poly(A) tail will be 30 nm assuming it is completely extended and the poly(A) tail length  
627 is 100 nucleotides. Given that the compaction is ~20 fold relative to contour length, and the  
628 contour length of 1000 nucleotides is 300 nm, and given where the 5' end smFISH probes bind  
629 on AHNAK and DYNC1H1 mRNAs, we estimate the distance will be approximately 22.5 nm or  
630 7.5 nm from the m<sup>7</sup>G cap respectively. Similarly, we estimate the distance between 3' end  
631 smFISH probes and the start of the poly(A) tail for both AHNAK and DYNC1H1 to be 7.5 nm.  
632 Therefore, distances less than 80 nm and 65 nm between 5' and 3' end smFISH spots for  
633 AHNAK and DYNC1H1 mRNAs are consistent with the closed-loop model.

634  
635  
636  
637  
638  
639  
640  
641  
642  
643  
644  
645  
646

647 **References**

- 648
- 649 Adivarahan, S., S. Rahman, and D. Zenklusen. 2017. Spatial organization of single mRNPs at  
650 different stages of the gene expression pathway. *bioRxiv*. doi: 10.1101/237008.
- 651 Afonina, Z.A., A.G. Myasnikov, V.A. Shirokov, B.P. Klaholz, and A.S. Spirin. 2014. Formation of  
652 circular polyribosomes on eukaryotic mRNA without cap-structure and poly(A)-tail: a  
653 cryo electron tomography study. *Nucleic Acids Res.* 42:9461-9469.
- 654 Afonina, Z.A., A.G. Myasnikov, V.A. Shirokov, B.P. Klaholz, and A.S. Spirin. 2015. Conformation  
655 transitions of eukaryotic polyribosomes during multi-round translation. *Nucleic Acids*  
656 *Res.* 43:618-628.
- 657 Afonina Zh, A., A.G. Myasnikov, N.F. Khabibullina, A.Y. Belorusova, J.F. Menetret, V.D. Vasiliev,  
658 B.P. Klaholz, V.A. Shirokov, and A.S. Spirin. 2013. Topology of mRNA chain in isolated  
659 eukaryotic double-row polyribosomes. *Biochemistry (Mosc).* 78:445-454.
- 660 Agrawal, R.K., P. Penczek, R.A. Grassucci, Y. Li, A. Leith, K.H. Nierhaus, and J. Frank. 1996. Direct  
661 visualization of A-, P-, and E-site transfer RNAs in the Escherichia coli ribosome. *Science*.  
662 271:1000-1002.
- 663 Arava, Y., Y. Wang, J.D. Storey, C.L. Liu, P.O. Brown, and D. Herschlag. 2003. Genome-wide  
664 analysis of mRNA translation profiles in Saccharomyces cerevisiae. *Proc Natl Acad Sci U S*  
665 *A.* 100:3889-3894.
- 666 Brandman, O., and R.S. Hegde. 2016. Ribosome-associated protein quality control. *Nat Struct*  
667 *Mol Biol.* 23:7-15.
- 668 Brandman, O., J. Stewart-Ornstein, D. Wong, A. Larson, C.C. Williams, G.W. Li, S. Zhou, D. King,  
669 P.S. Shen, J. Weibezahn, J.G. Dunn, S. Rouskin, T. Inada, A. Frost, and J.S. Weissman.  
670 2012. A ribosome-bound quality control complex triggers degradation of nascent  
671 peptides and signals translation stress. *Cell.* 151:1042-1054.
- 672 Brandt, F., L.A. Carlson, F.U. Hartl, W. Baumeister, and K. Grunewald. 2010. The three-  
673 dimensional organization of polyribosomes in intact human cells. *Mol Cell.* 39:560-569.
- 674 Brandt, F., S.A. Etchells, J.O. Ortiz, A.H. Elcock, F.U. Hartl, and W. Baumeister. 2009. The native  
675 3D organization of bacterial polysomes. *Cell.* 136:261-271.
- 676 Buchan, J.R., R.M. Kolaitis, J.P. Taylor, and R. Parker. 2013. Eukaryotic stress granules are  
677 cleared by autophagy and Cdc48/VCP function. *Cell.* 153:1461-1474.
- 678 Buchan, J.R., and R. Parker. 2009. Eukaryotic stress granules: the ins and outs of translation.  
679 *Mol Cell.* 36:932-941.
- 680 Chang, H., J. Lim, M. Ha, and V.N. Kim. 2014. TAIL-seq: genome-wide determination of poly(A)  
681 tail length and 3' end modifications. *Mol Cell.* 53:1044-1052.
- 682 Chiabudini, M., A. Tais, Y. Zhang, S. Hayashi, T. Wolfle, E. Fitzke, and S. Rospert. 2014. Release  
683 factor eRF3 mediates premature translation termination on polylysine-stalled ribosomes  
684 in Saccharomyces cerevisiae. *Mol Cell Biol.* 34:4062-4076.
- 685 Clote, P., Y. Ponty, and J.M. Steyaert. 2012. Expected distance between terminal nucleotides of  
686 RNA secondary structures. *J Math Biol.* 65:581-599.
- 687 Daneholt, B., K. Anderson, and M. Fagerlind. 1977. Large-sized polysomes in Chironomus  
688 tentans salivary glands and their relation to Balbiani ring 75S RNA. *J Cell Biol.* 73:149-  
689 160.

- 690 Dewey, C.M., B. Cenik, C.F. Sephton, B.A. Johnson, J. Herz, and G. Yu. 2012. TDP-43 aggregation  
691 in neurodegeneration: are stress granules the key? *Brain Res.* 1462:16-25.
- 692 Eldad, N., Y. Yosefzon, and Y. Arava. 2008. Identification and characterization of extensive intra-  
693 molecular associations between 3'-UTRs and their ORFs. *Nucleic Acids Res.* 36:6728-  
694 6738.
- 695 Fang, L.T., W.M. Gelbart, and A. Ben-Shaul. 2011. The size of RNA as an ideal branched polymer.  
696 *J Chem Phys.* 135:155105.
- 697 Gaspar, I., F. Wippich, and A. Ephrussi. 2017. Enzymatic production of single-molecule FISH and  
698 RNA capture probes. *RNA.* 23:1582-1591.
- 699 Harigaya, Y., and R. Parker. 2010. No-go decay: a quality control mechanism for RNA in  
700 translation. *Wiley Interdiscip Rev RNA.* 1:132-141.
- 701 Hendrickson, D.G., D.J. Hogan, H.L. McCullough, J.W. Myers, D. Herschlag, J.E. Ferrell, and P.O.  
702 Brown. 2009. Concordant regulation of translation and mRNA abundance for hundreds  
703 of targets of a human microRNA. *PLoS Biol.* 7:e1000238.
- 704 Hinnebusch, A.G., and J.R. Lorsch. 2012. The mechanism of eukaryotic translation initiation:  
705 new insights and challenges. *Cold Spring Harb Perspect Biol.* 4.
- 706 Kedersha, N., M.R. Cho, W. Li, P.W. Yacono, S. Chen, N. Gilks, D.E. Golan, and P. Anderson.  
707 2000. Dynamic shuttling of TIA-1 accompanies the recruitment of mRNA to mammalian  
708 stress granules. *J Cell Biol.* 151:1257-1268.
- 709 Kedersha, N., P. Ivanov, and P. Anderson. 2013. Stress granules and cell signaling: more than  
710 just a passing phase? *Trends Biochem Sci.* 38:494-506.
- 711 Kedersha, N., M.D. Panas, C.A. Achorn, S. Lyons, S. Tisdale, T. Hickman, M. Thomas, J.  
712 Lieberman, G.M. McInerney, P. Ivanov, and P. Anderson. 2016. G3BP-Caprin1-USP10  
713 complexes mediate stress granule condensation and associate with 40S subunits. *J Cell*  
714 *Biol.* 212:845-860.
- 715 Khong, A., S. Jain, T. Matheny, J.R. Wheeler, and R. Parker. 2018. Isolation of mammalian stress  
716 granule cores for RNA-Seq analysis. *Methods.* 137:49-54.
- 717 Khong, A., T. Matheny, S. Jain, S.F. Mitchell, J.R. Wheeler, and R. Parker. 2017. The Stress  
718 Granule Transcriptome Reveals Principles of mRNA Accumulation in Stress Granules.  
719 *Mol Cell.* 68:808-820 e805.
- 720 Kim, N.C., E. Tresse, R.M. Kolaitis, A. Molliex, R.E. Thomas, N.H. Alami, B. Wang, A. Joshi, R.B.  
721 Smith, G.P. Ritson, B.J. Winborn, J. Moore, J.Y. Lee, T.P. Yao, L. Pallanck, M. Kundu, and  
722 J.P. Taylor. 2013. VCP is essential for mitochondrial quality control by PINK1/Parkin and  
723 this function is impaired by VCP mutations. *Neuron.* 78:65-80.
- 724 Kopeina, G.S., Z.A. Afonina, K.V. Gromova, V.A. Shirokov, V.D. Vasiliev, and A.S. Spirin. 2008.  
725 Step-wise formation of eukaryotic double-row polyribosomes and circular translation of  
726 polysomal mRNA. *Nucleic Acids Res.* 36:2476-2488.
- 727 Lai, W.C., M. Kayedkhordeh, E.V. Cornell, E. Farah, S. Bellaousov, R. Rietmeijer, D.H. Mathews,  
728 and D.N. Ermolenko. 2018. The formation of intramolecular secondary structure brings  
729 mRNA ends in close proximity. *bioRxiv.* doi: 10.1101/289496.
- 730 Li, Y.R., O.D. King, J. Shorter, and A.D. Gitler. 2013. Stress granules as crucibles of ALS  
731 pathogenesis. *J Cell Biol.* 201:361-372.
- 732 Mackenzie, I.R., A.M. Nicholson, M. Sarkar, J. Messing, M.D. Purice, C. Pottier, K. Annu, M.  
733 Baker, R.B. Perkinson, A. Kurti, B.J. Matchett, T. Mittag, J. Temirov, G.R. Hsiung, C.

- 734 Krieger, M.E. Murray, M. Kato, J.D. Fryer, L. Petrucelli, L. Zinman, S. Weintraub, M.  
735 Mesulam, J. Keith, S.A. Zivkovic, V. Hirsch-Reinshagen, R.P. Roos, S. Zuchner, N.R. Graff-  
736 Radford, R.C. Petersen, R.J. Caselli, Z.K. Wszolek, E. Finger, C. Lippa, D. Lacomis, H.  
737 Stewart, D.W. Dickson, H.J. Kim, E. Rogaeva, E. Bigio, K.B. Boylan, J.P. Taylor, and R.  
738 Rademakers. 2017. TIA1 Mutations in Amyotrophic Lateral Sclerosis and Frontotemporal  
739 Dementia Promote Phase Separation and Alter Stress Granule Dynamics. *Neuron*.  
740 95:808-816 e809.
- 741 Madin, K., T. Sawasaki, N. Kamura, K. Takai, T. Ogasawara, K. Yazaki, T. Takei, K. Miura, and Y.  
742 Endo. 2004. Formation of circular polyribosomes in wheat germ cell-free protein  
743 synthesis system. *FEBS Lett*. 562:155-159.
- 744 Milo, R., P. Jorgensen, U. Moran, G. Weber, and M. Springer. 2010. BioNumbers--the database  
745 of key numbers in molecular and cell biology. *Nucleic Acids Res*. 38:D750-753.
- 746 Moon, S.L., T. Morisaki, A. Khong, K. Lyon, R. Parker, and T.J. Stasevich. 2018. Imaging of single  
747 mRNA translation repression reveals diverse interactions with mRNP granules. *bioRxiv*.  
748 doi: 10.1101/332692.
- 749 Morisaki, T., K. Lyon, K.F. DeLuca, J.G. DeLuca, B.P. English, Z. Zhang, L.D. Lavis, J.B. Grimm, S.  
750 Viswanathan, L.L. Looger, T. Lionnet, and T.J. Stasevich. 2016. Real-time quantification  
751 of single RNA translation dynamics in living cells. *Science*. 352:1425-1429.
- 752 Myasnikov, A.G., Z.A. Afonina, J.F. Menetret, V.A. Shirokov, A.S. Spirin, and B.P. Klaholz. 2014.  
753 The molecular structure of the left-handed supra-molecular helix of eukaryotic  
754 polyribosomes. *Nat Commun*. 5:5294.
- 755 Namkoong, S., A. Ho, Y.M. Woo, H. Kwak, and J.H. Lee. 2018. Systematic Characterization of  
756 Stress-Induced RNA Granulation. *Mol Cell*. 70:175-187 e178.
- 757 Palade, G.E. 1955. A small particulate component of the cytoplasm. *J Biophys Biochem Cytol*.  
758 1:59-68.
- 759 Panas, M.D., P. Ivanov, and P. Anderson. 2016. Mechanistic insights into mammalian stress  
760 granule dynamics. *J Cell Biol*. 215:313-323.
- 761 Pichon, X., A. Bastide, A. Safieddine, R. Chouaib, A. Samacoits, E. Basyuk, M. Peter, F. Mueller,  
762 and E. Bertrand. 2016. Visualization of single endogenous polysomes reveals the  
763 dynamics of translation in live human cells. *J Cell Biol*. 214:769-781.
- 764 Protter, D.S., and R. Parker. 2016. Principles and Properties of Stress Granules. *Trends Cell Biol*.  
765 26:668-679.
- 766 Ramaswami, M., J.P. Taylor, and R. Parker. 2013. Altered ribostasis: RNA-protein granules in  
767 degenerative disorders. *Cell*. 154:727-736.
- 768 Shoemaker, C.J., D.E. Eyler, and R. Green. 2010. Dom34:Hbs1 promotes subunit dissociation  
769 and peptidyl-tRNA drop-off to initiate no-go decay. *Science*. 330:369-372.
- 770 Shoemaker, C.J., and R. Green. 2012. Translation drives mRNA quality control. *Nat Struct Mol*  
771 *Biol*. 19:594-601.
- 772 Steitz, J.A. 1969. Polypeptide chain initiation: nucleotide sequences of the three ribosomal  
773 binding sites in bacteriophage R17 RNA. *Nature*. 224:957-964.
- 774 Van Treeck, B., D.S.W. Protter, T. Matheny, A. Khong, C.D. Link, and R. Parker. 2018. RNA self-  
775 assembly contributes to stress granule formation and defining the stress granule  
776 transcriptome. *Proc Natl Acad Sci U S A*. 115:2734-2739.

- 777 Viero, G., L. Lunelli, A. Passerini, P. Bianchini, R.J. Gilbert, P. Bernabo, T. Tebaldi, A. Diaspro, C.  
778 Pederzoli, and A. Quattrone. 2015. Three distinct ribosome assemblies modulated by  
779 translation are the building blocks of polysomes. *J Cell Biol.* 208:581-596.
- 780 Wang, C., B. Han, R. Zhou, and X. Zhuang. 2016. Real-Time Imaging of Translation on Single  
781 mRNA Transcripts in Live Cells. *Cell.* 165:990-1001.
- 782 Warner, J.R., A. Rich, and C.E. Hall. 1962. Electron Microscope Studies of Ribosomal Clusters  
783 Synthesizing Hemoglobin. *Science.* 138:1399-1403.
- 784 Wettstein, F.O., T. Staehelin, and H. Noll. 1963. Ribosomal aggregate engaged in protein  
785 synthesis: characterization of the ergosome. *Nature.* 197:430-435.
- 786 Wheeler, J.R., T. Matheny, S. Jain, R. Abrisch, and R. Parker. 2016. Distinct stages in stress  
787 granule assembly and disassembly. *Elife.* 5.
- 788 Wolin, S.L., and P. Walter. 1988. Ribosome pausing and stacking during translation of a  
789 eukaryotic mRNA. *EMBO J.* 7:3559-3569.
- 790 Wu, B., C. Eliscovich, Y.J. Yoon, and R.H. Singer. 2016. Translation dynamics of single mRNAs in  
791 live cells and neurons. *Science.* 352:1430-1435.
- 792 Yan, X., T.A. Hoek, R.D. Vale, and M.E. Tanenbaum. 2016. Dynamics of Translation of Single  
793 mRNA Molecules In Vivo. *Cell.* 165:976-989.
- 794 Yazaki, K., T. Yoshida, M. Wakiyama, and K. Miura. 2000. Polysomes of eukaryotic cells observed  
795 by electron microscopy. *J Electron Microsc (Tokyo).* 49:663-668.
- 796 Yoffe, A.M., P. Prinsen, W.M. Gelbart, and A. Ben-Shaul. 2011. The ends of a large RNA  
797 molecule are necessarily close. *Nucleic Acids Res.* 39:292-299.
- 798

**Figure 1**

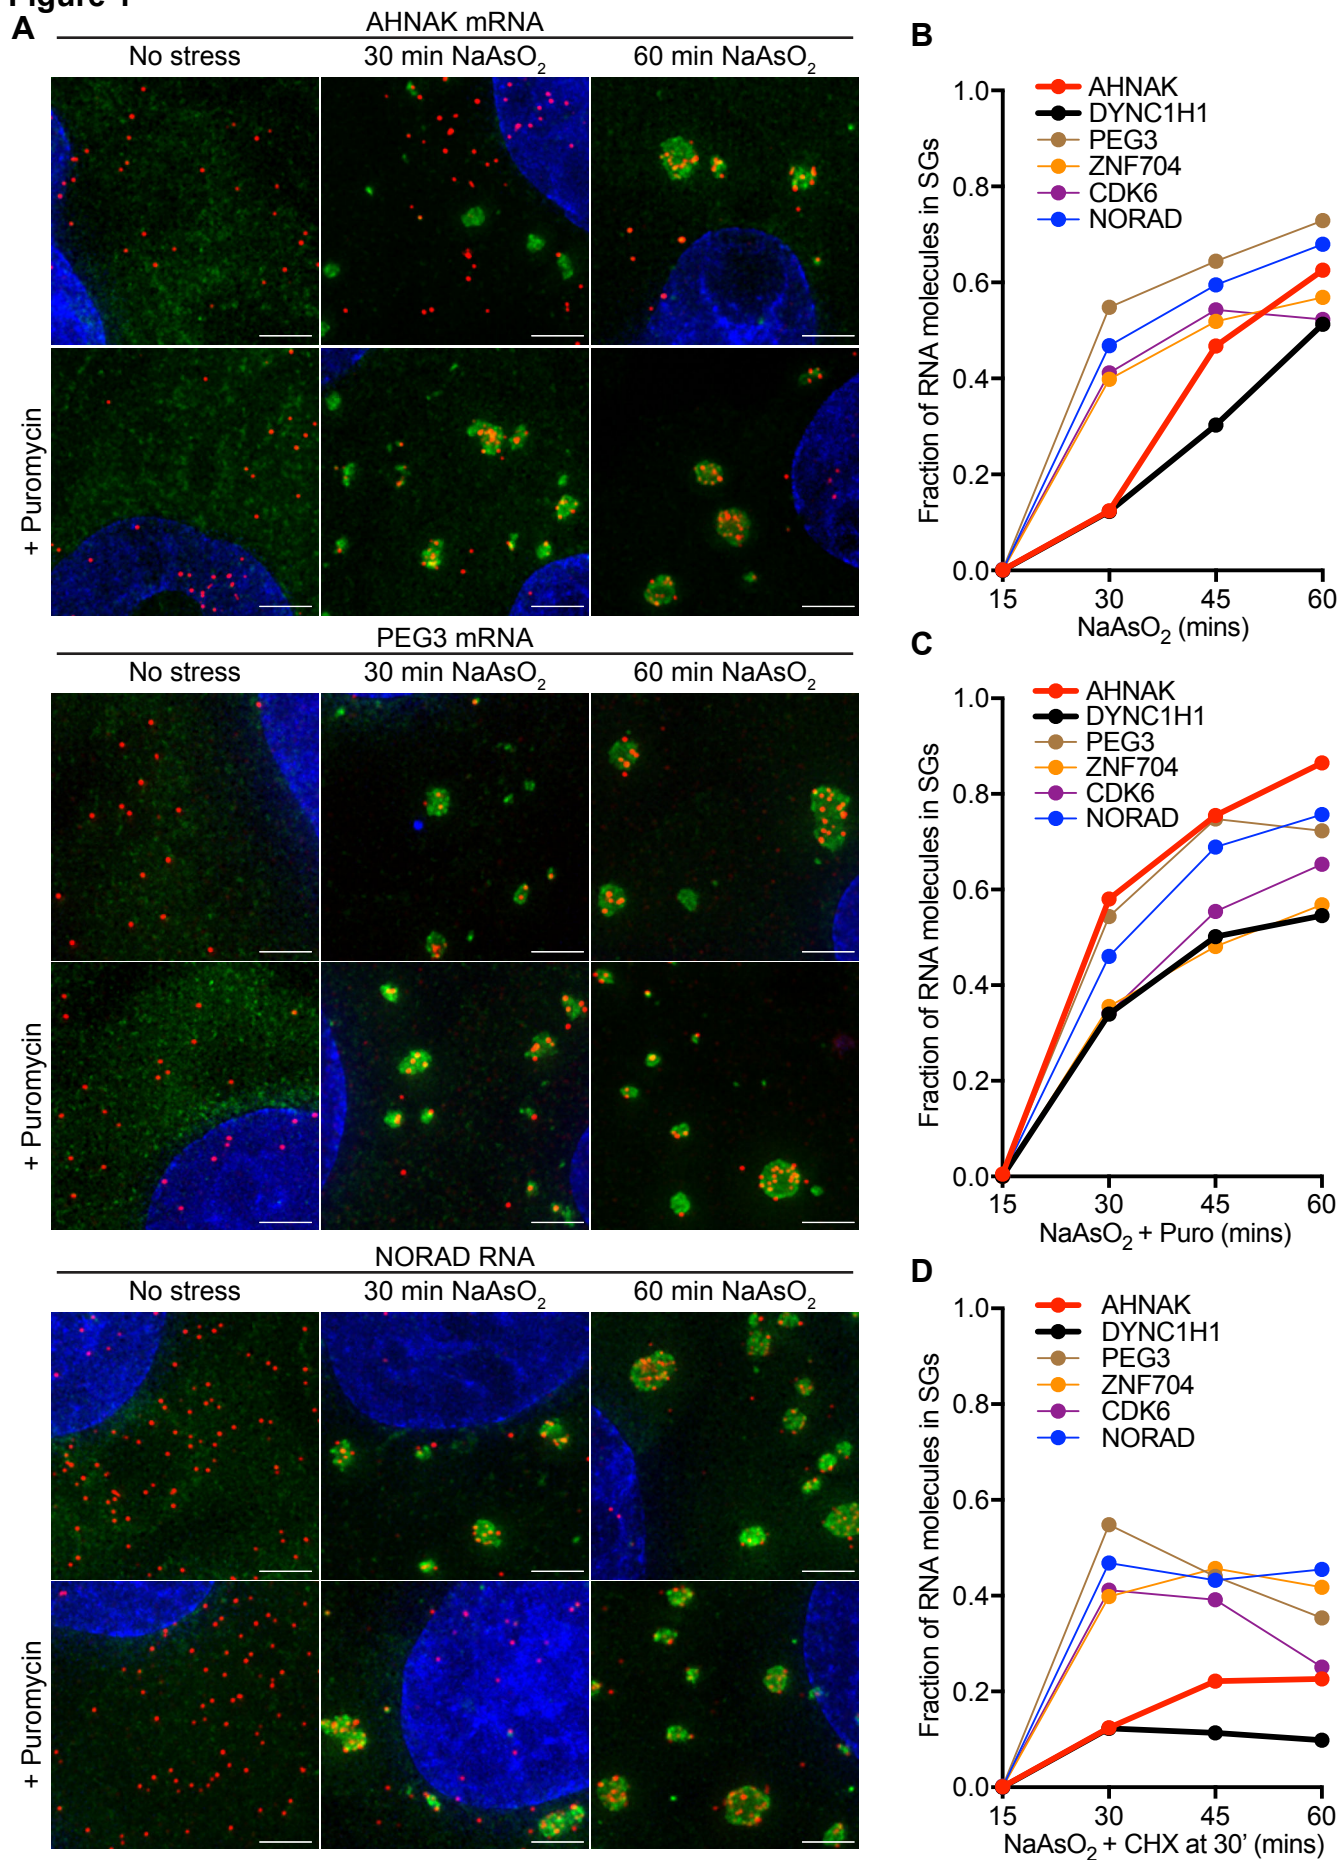

**Figure 2**

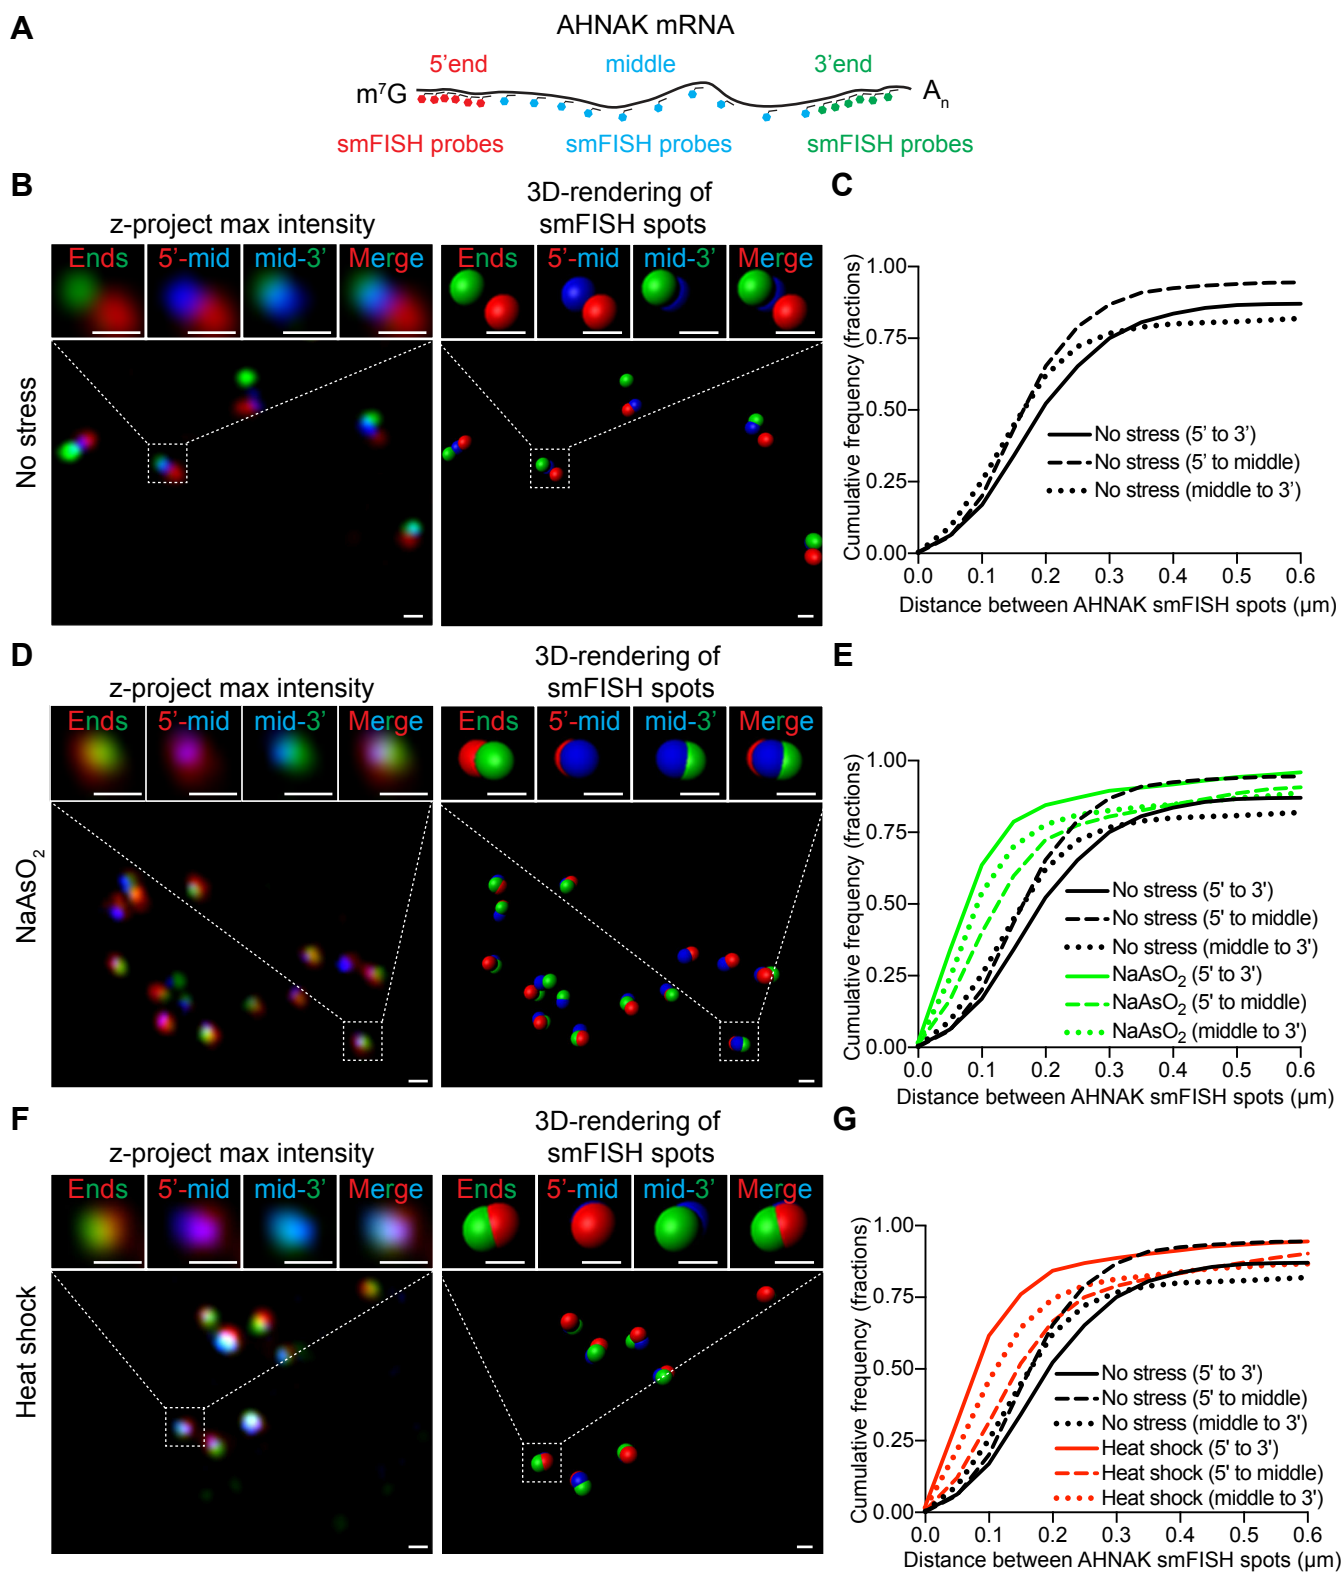



### Figure 3

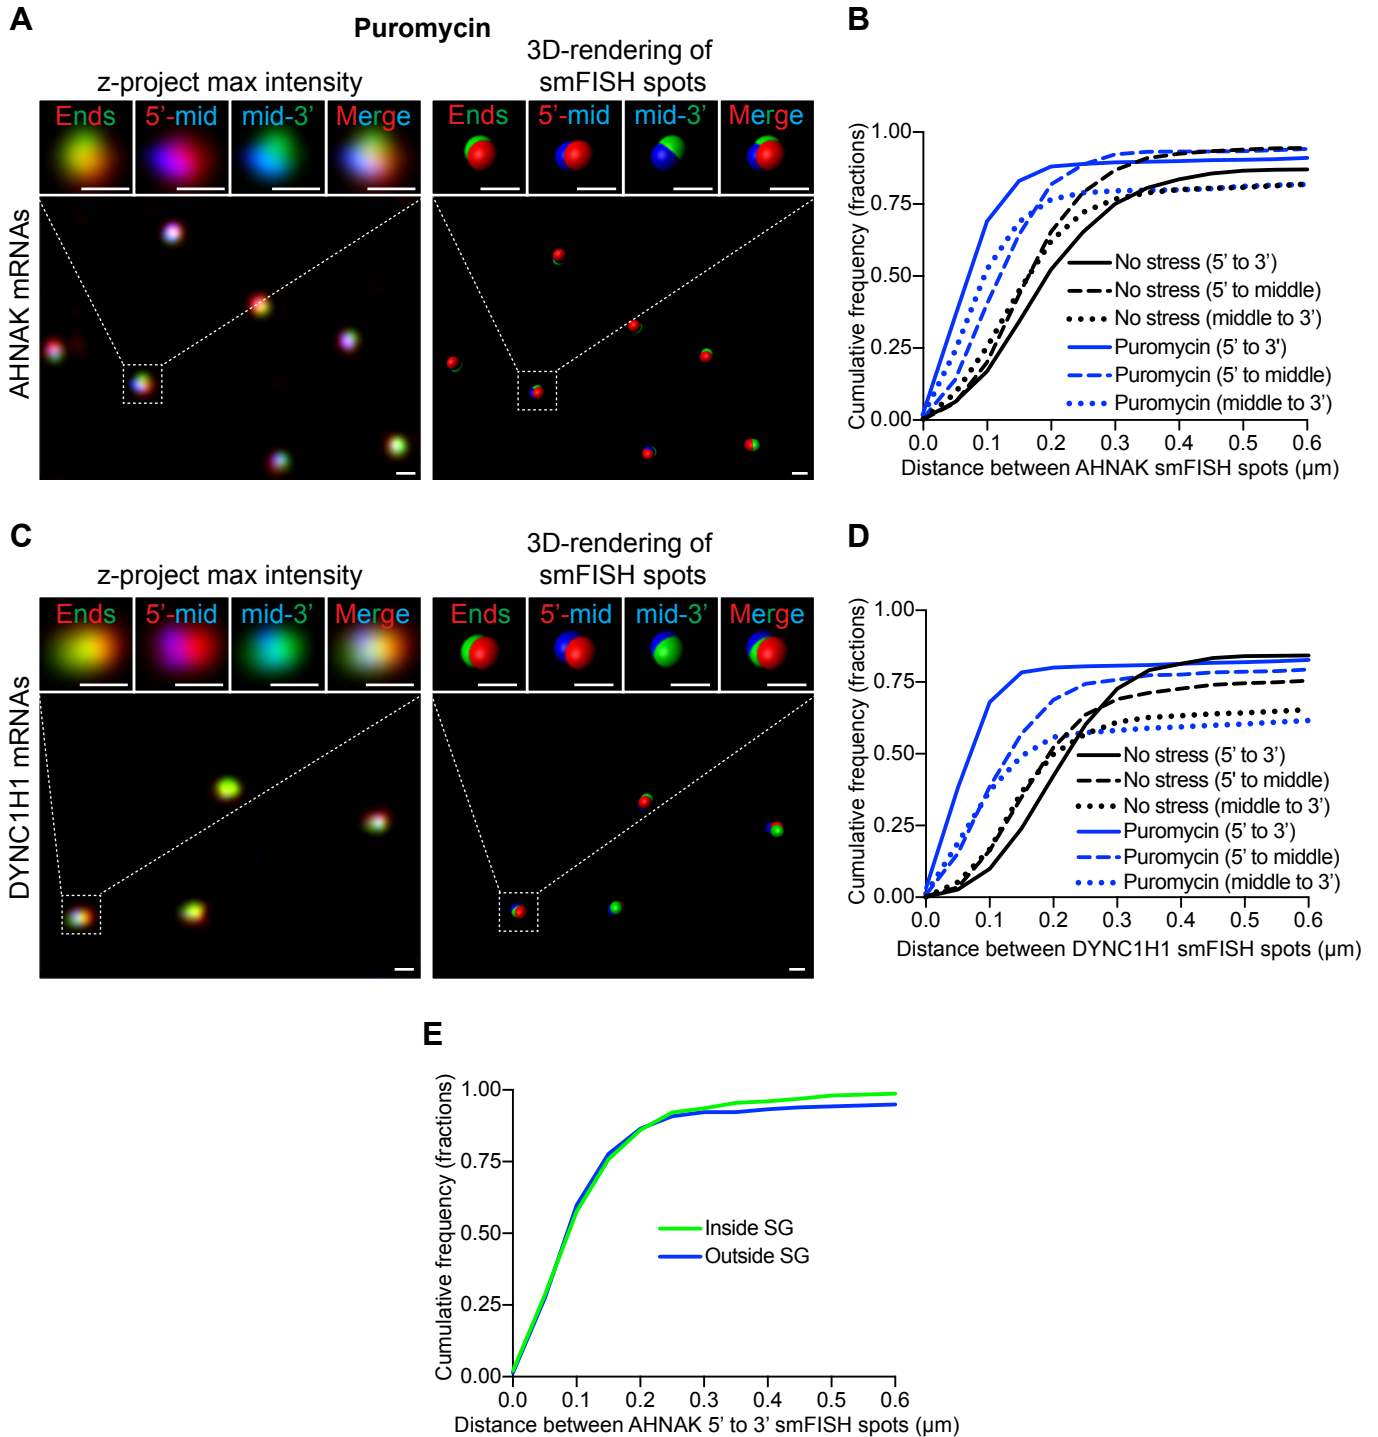

**Figure 4**

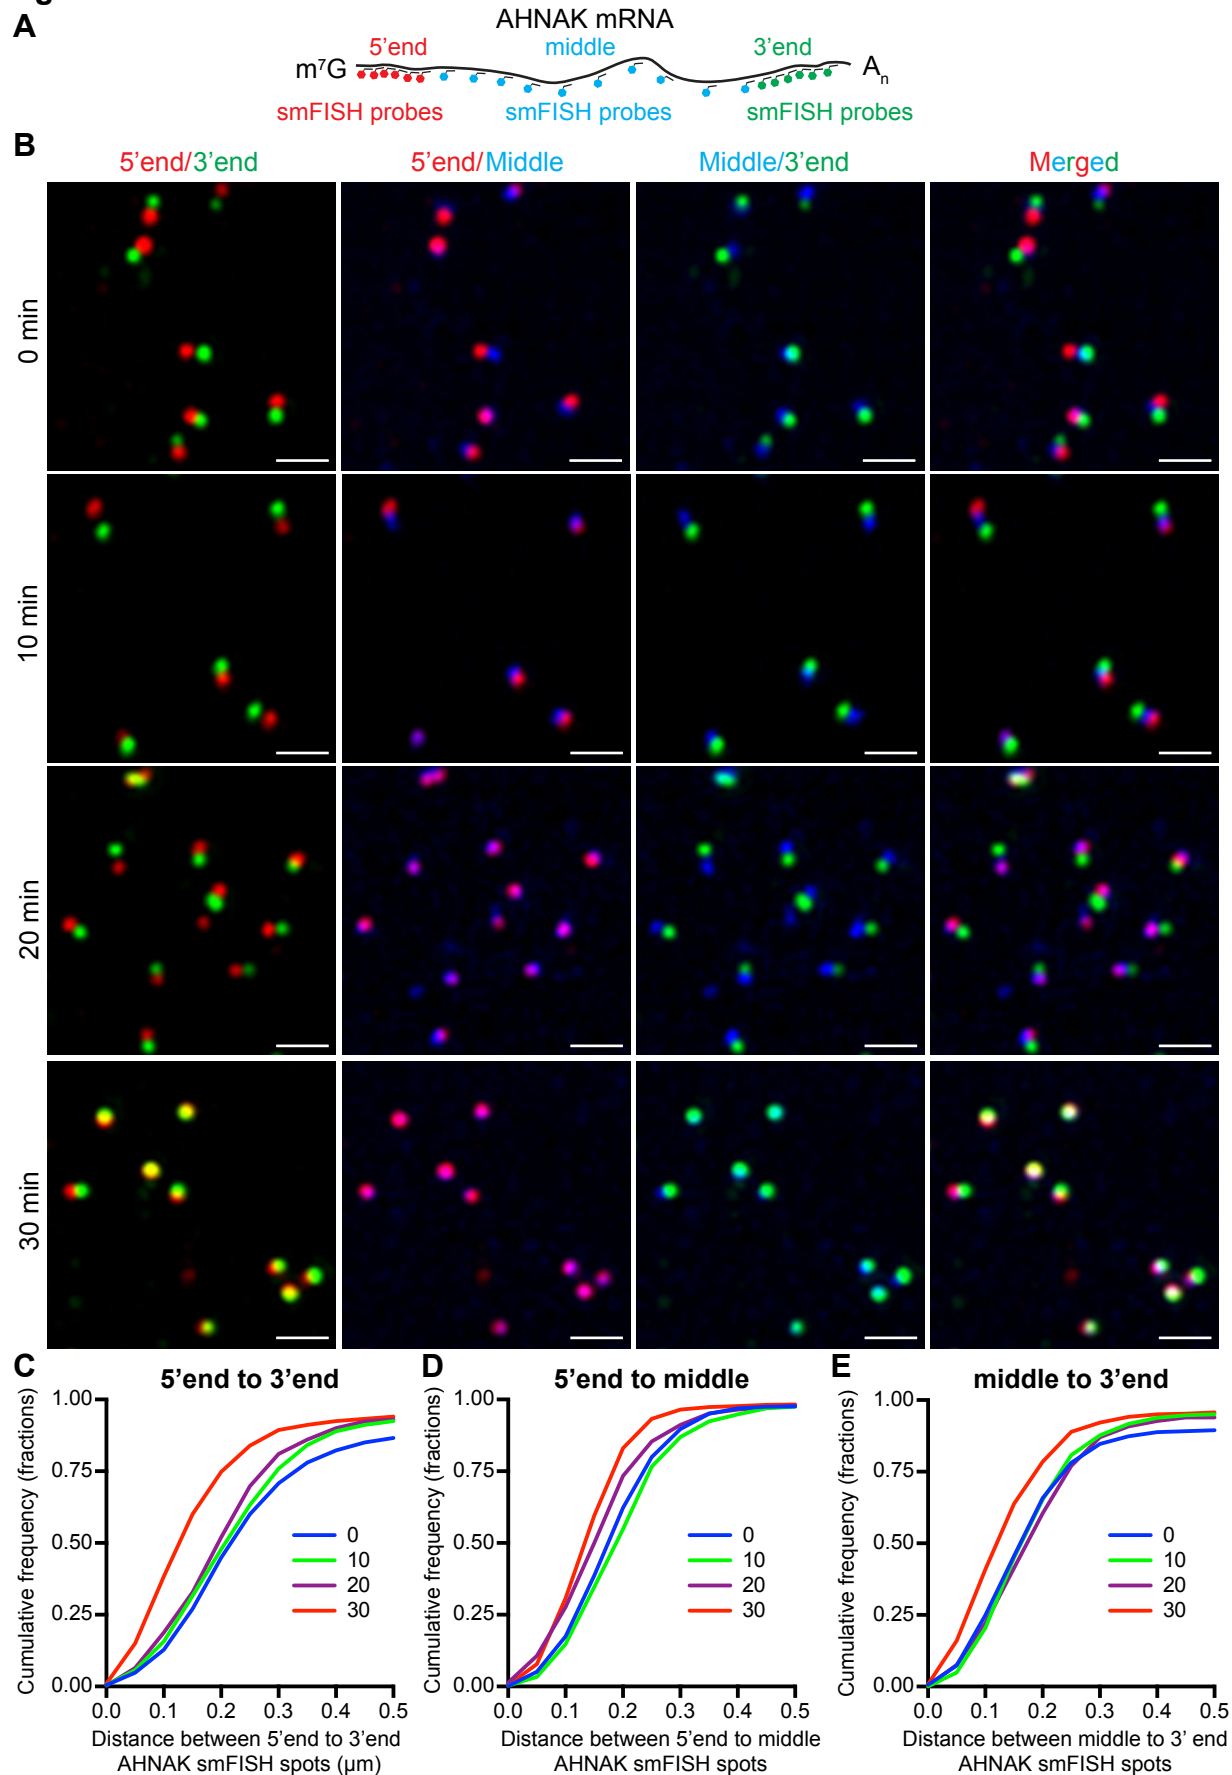

**Figure 5**

**A**

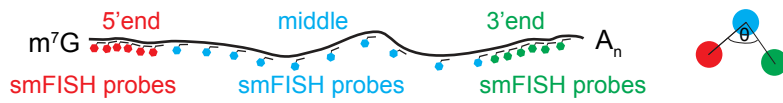

**B**

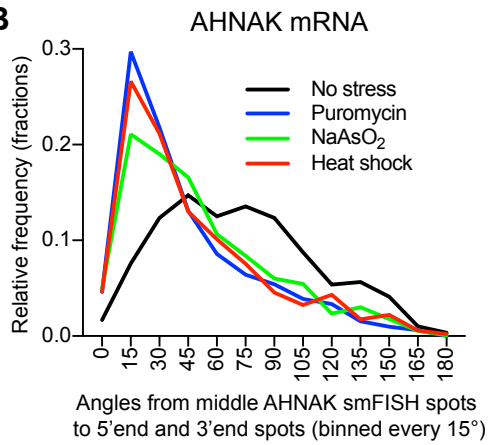

**C**

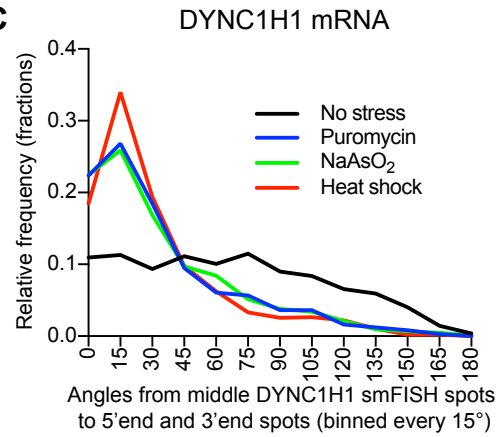

**Figure 6**

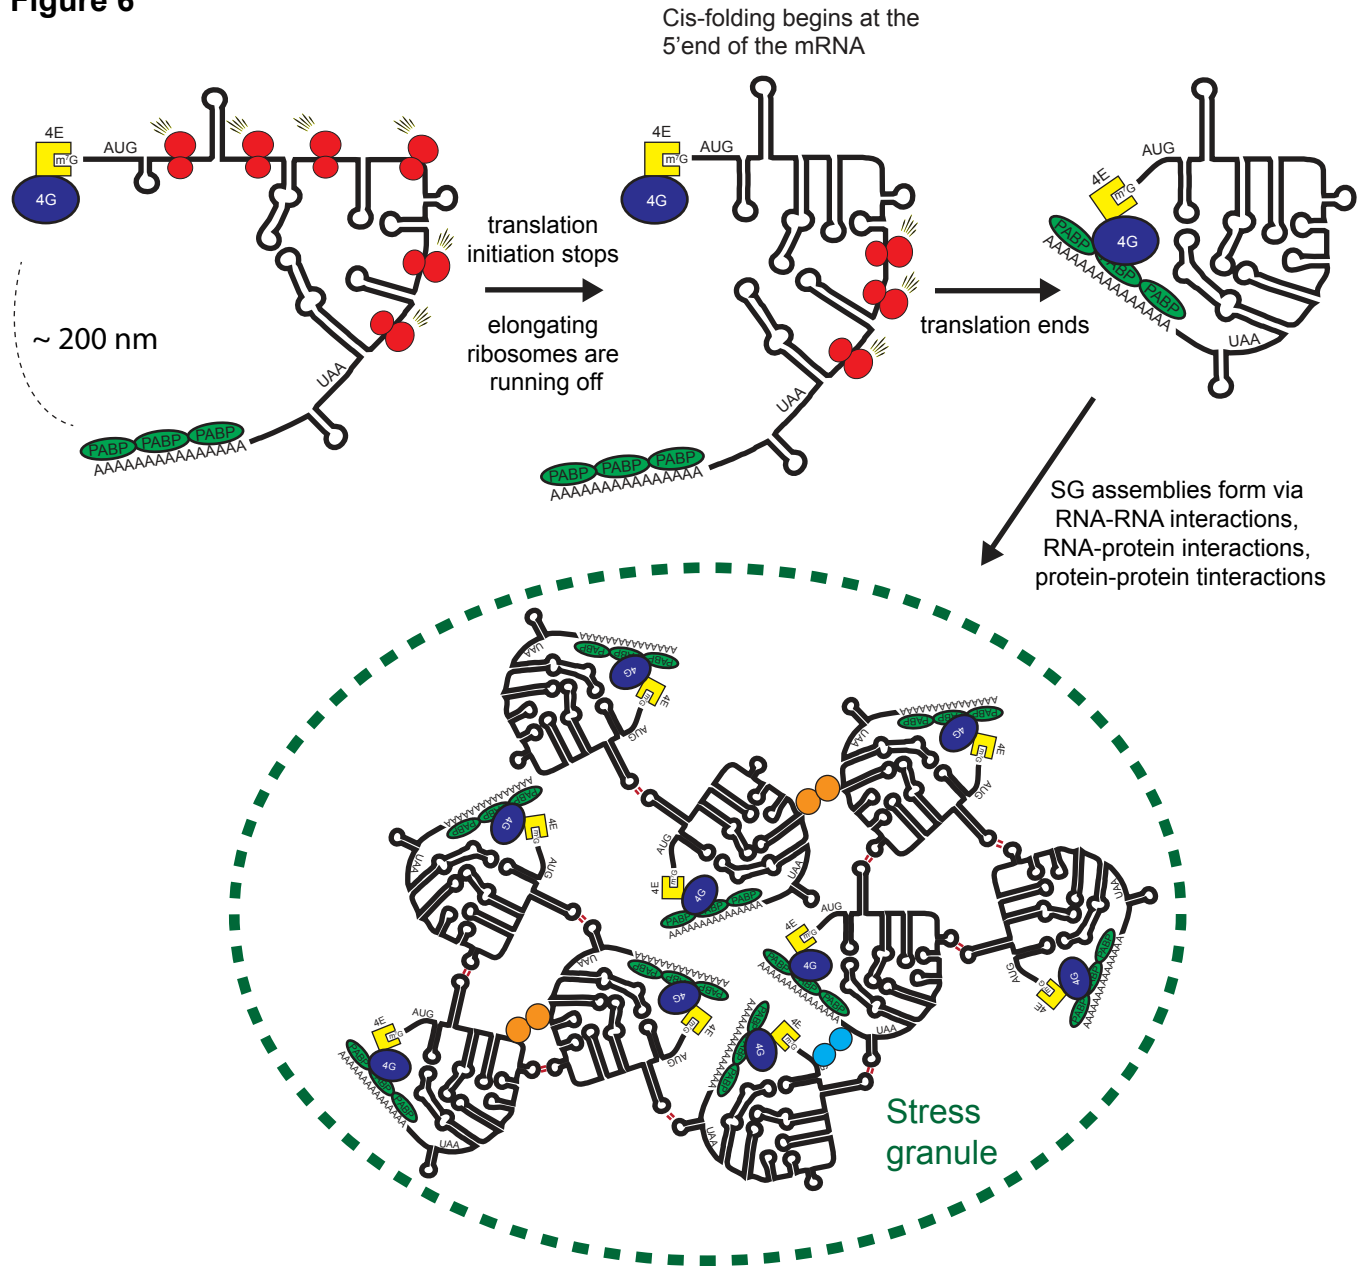

**Table 1. Predicated ribosome run-off time**

| mRNA    | total length (nt) | CDS length (nt) | Predicted ribosome run-off time (18nt/sec) |
|---------|-------------------|-----------------|--------------------------------------------|
| AHNAK   | 18,836            | 17,673          | ~16 min                                    |
| DYNC1H1 | 14,361            | 13,941          | ~13 min                                    |
| PEG3    | 8,765             | 4,767           | ~4 min                                     |
| ZNF704  | 14,403            | 1,239           | ~1 min                                     |
| CDK6    | 11,661            | 981             | ~1 min                                     |

## Supplemental Figure 1

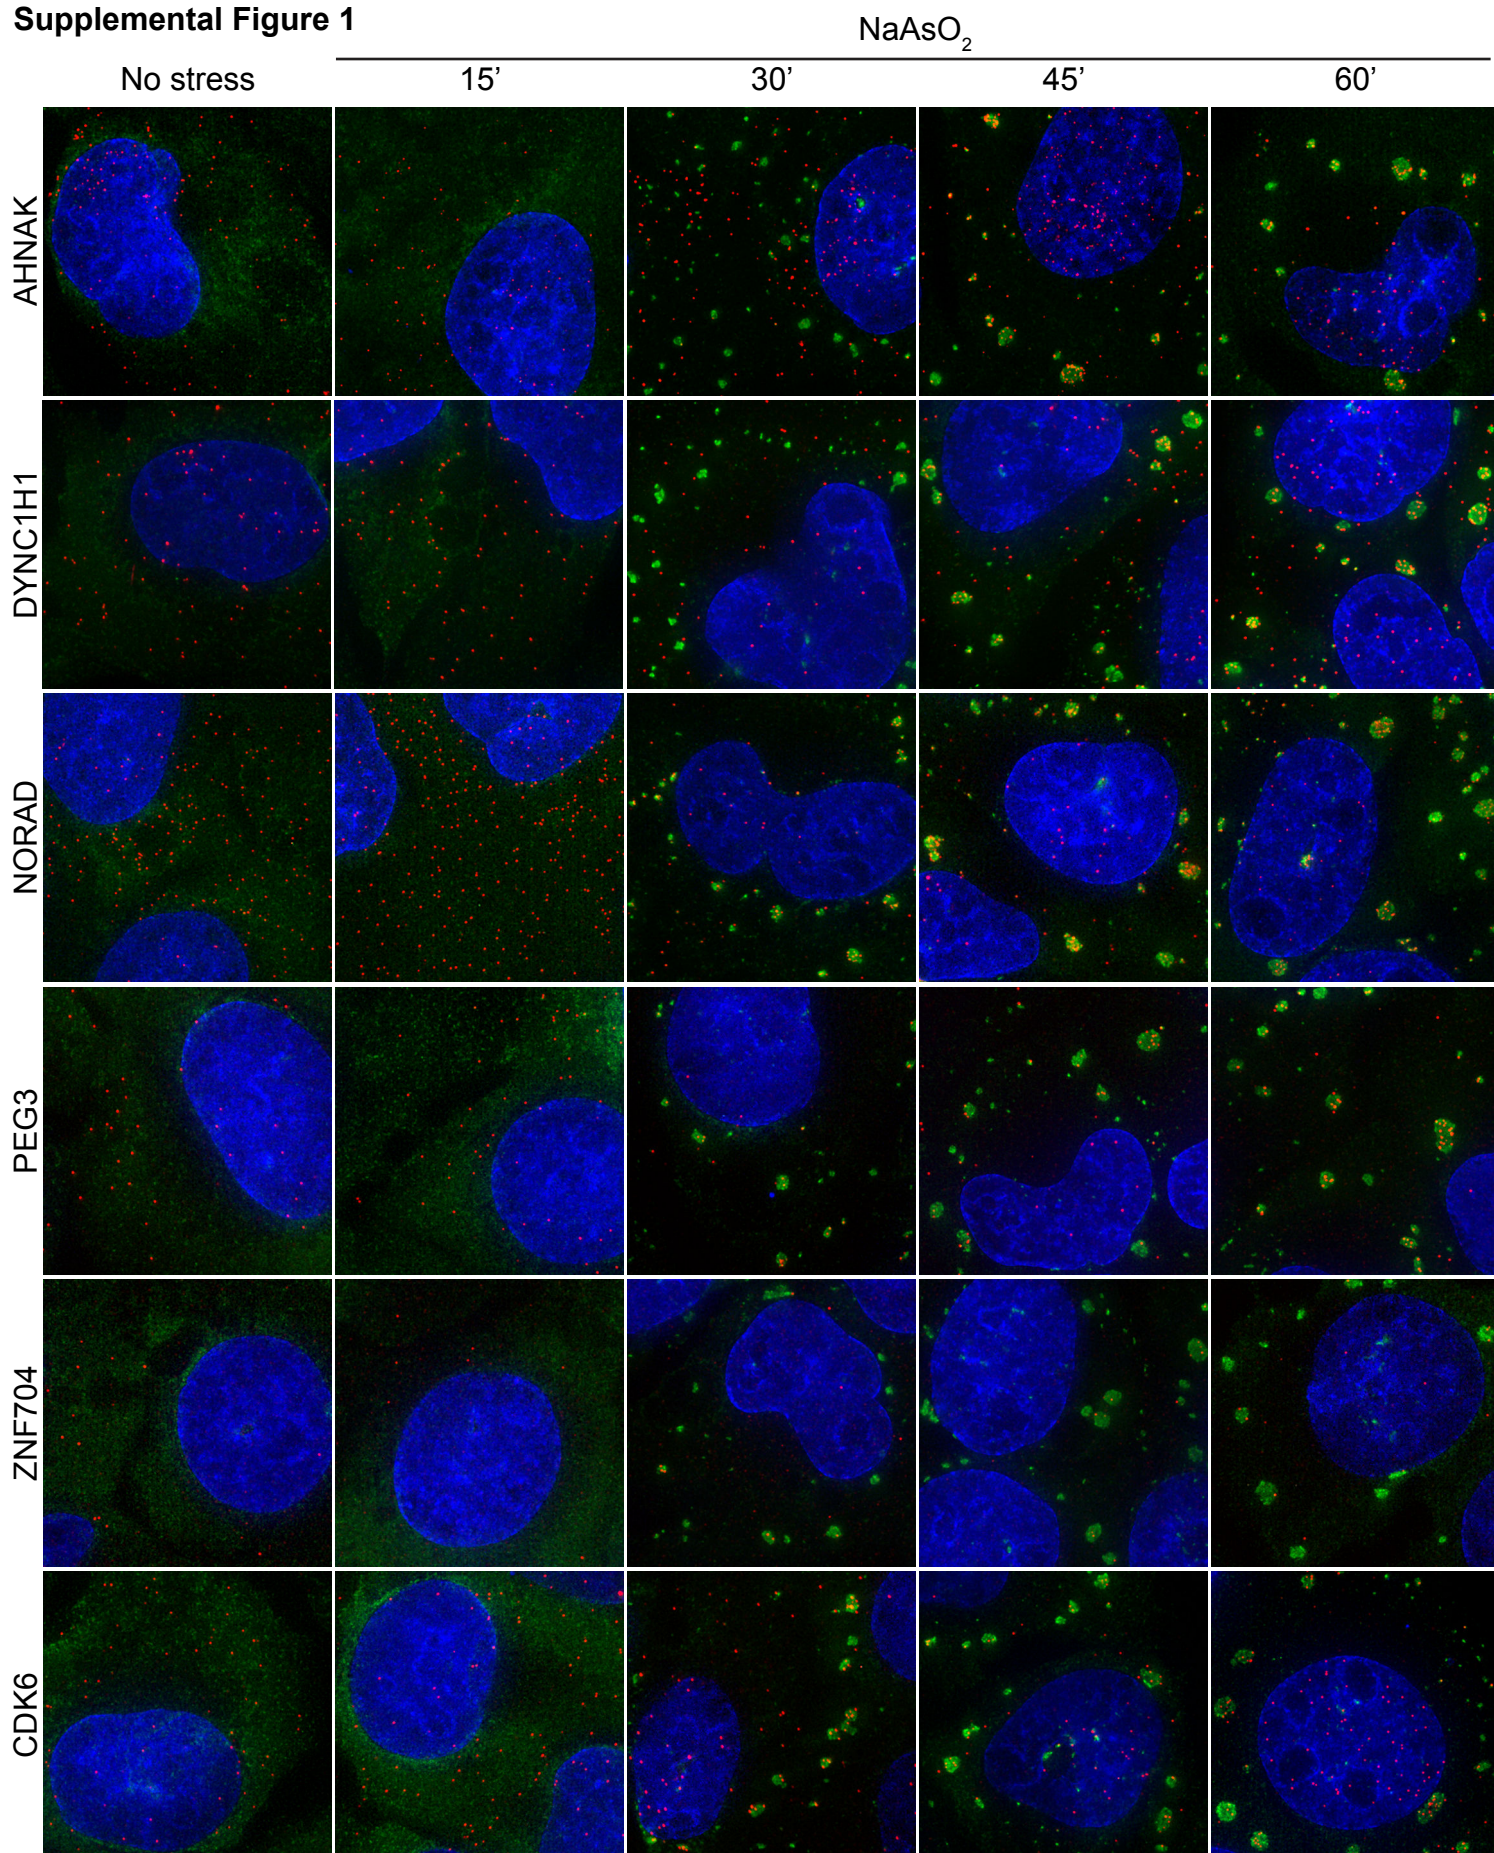

## Supplemental Figure 2

NaAsO<sub>2</sub> + Puromycin

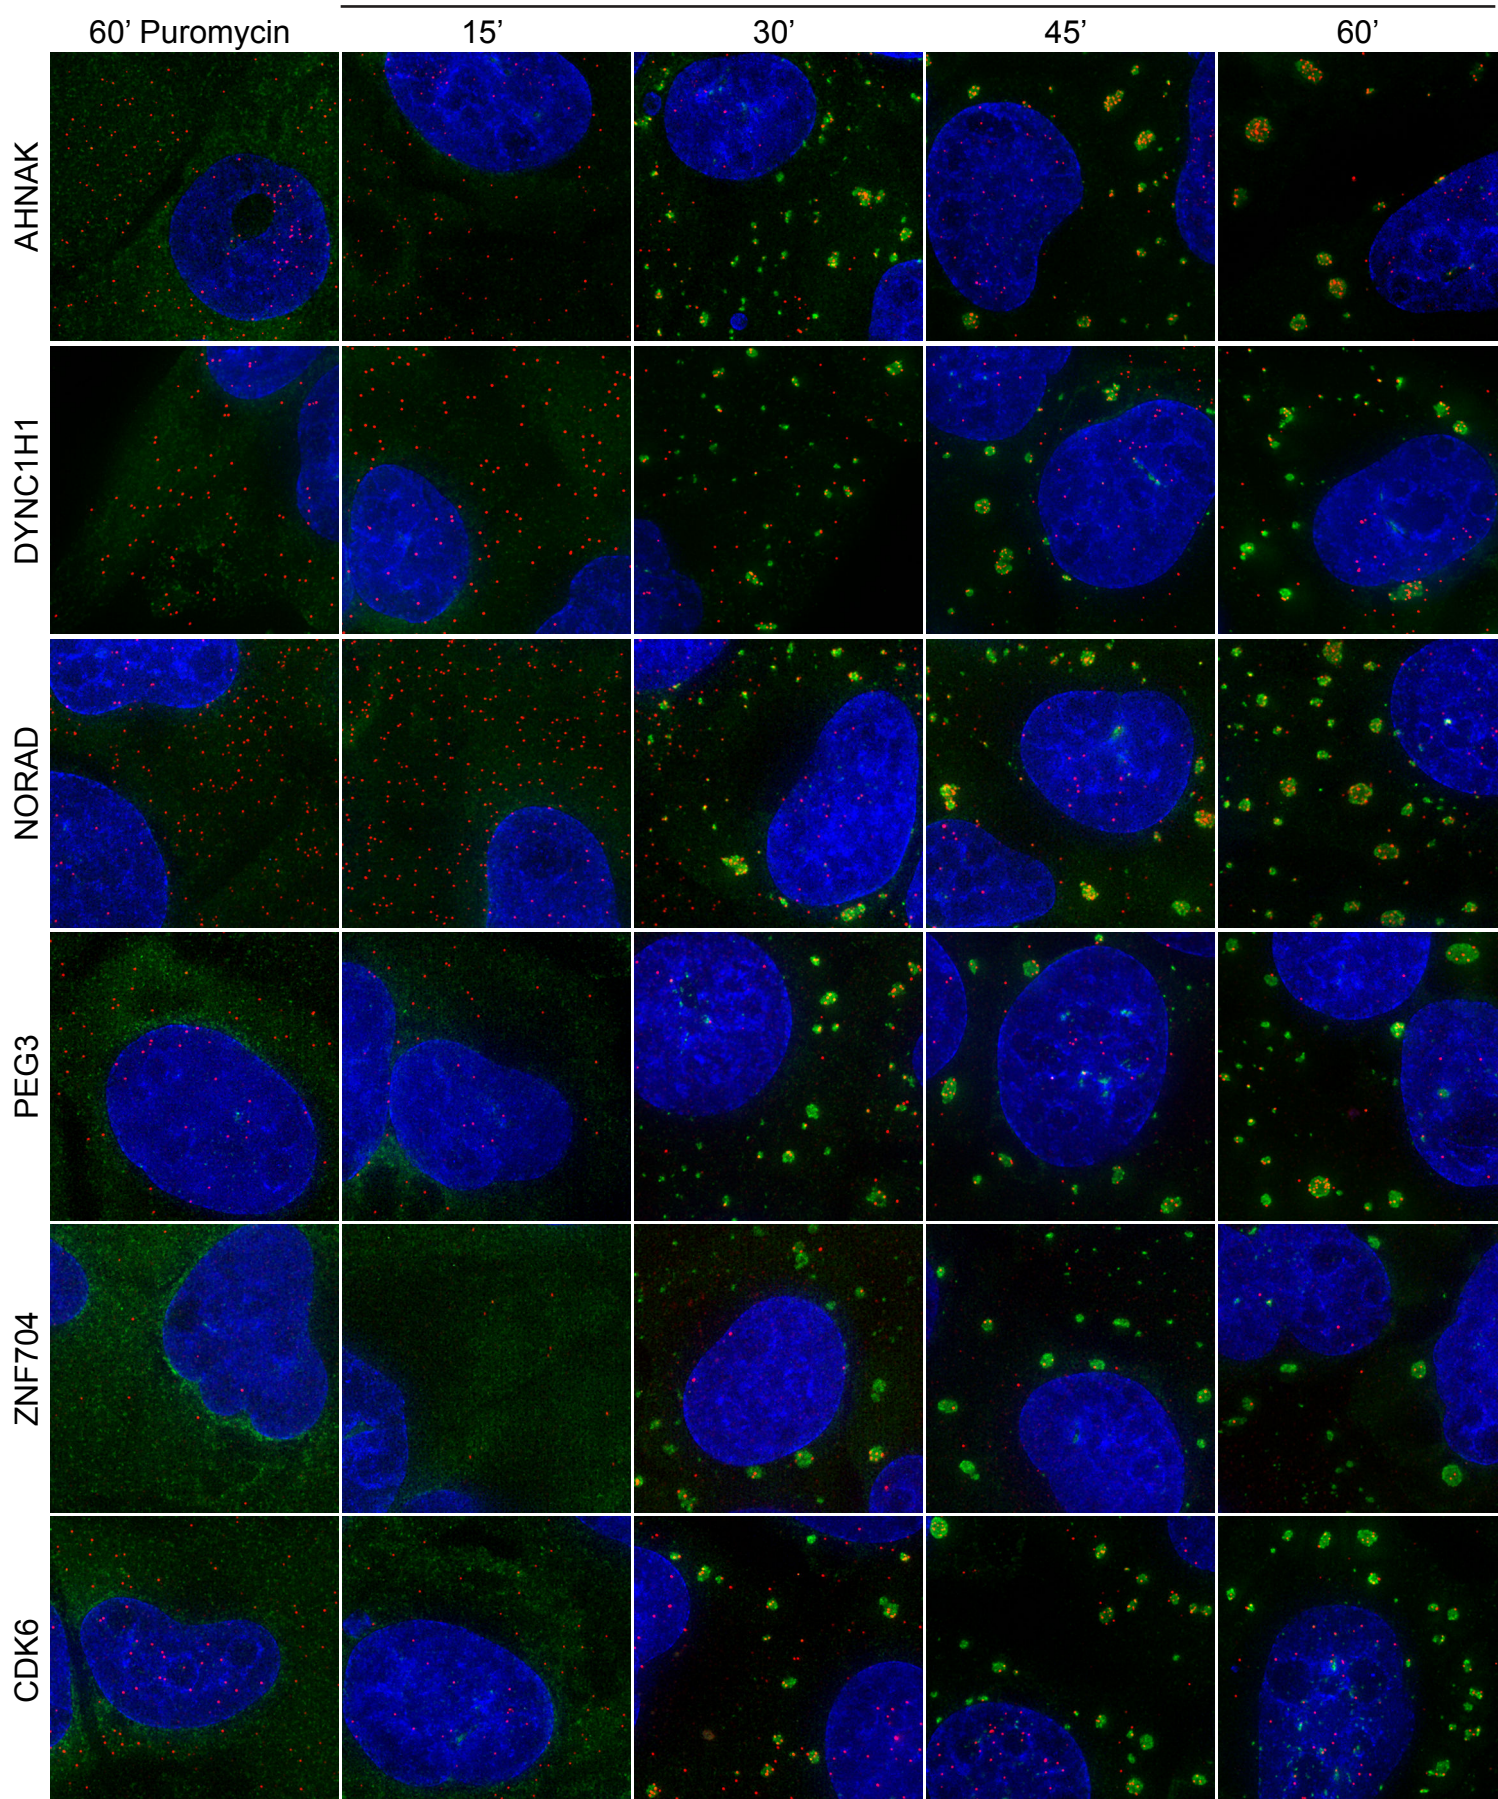

### Supplemental Figure 3

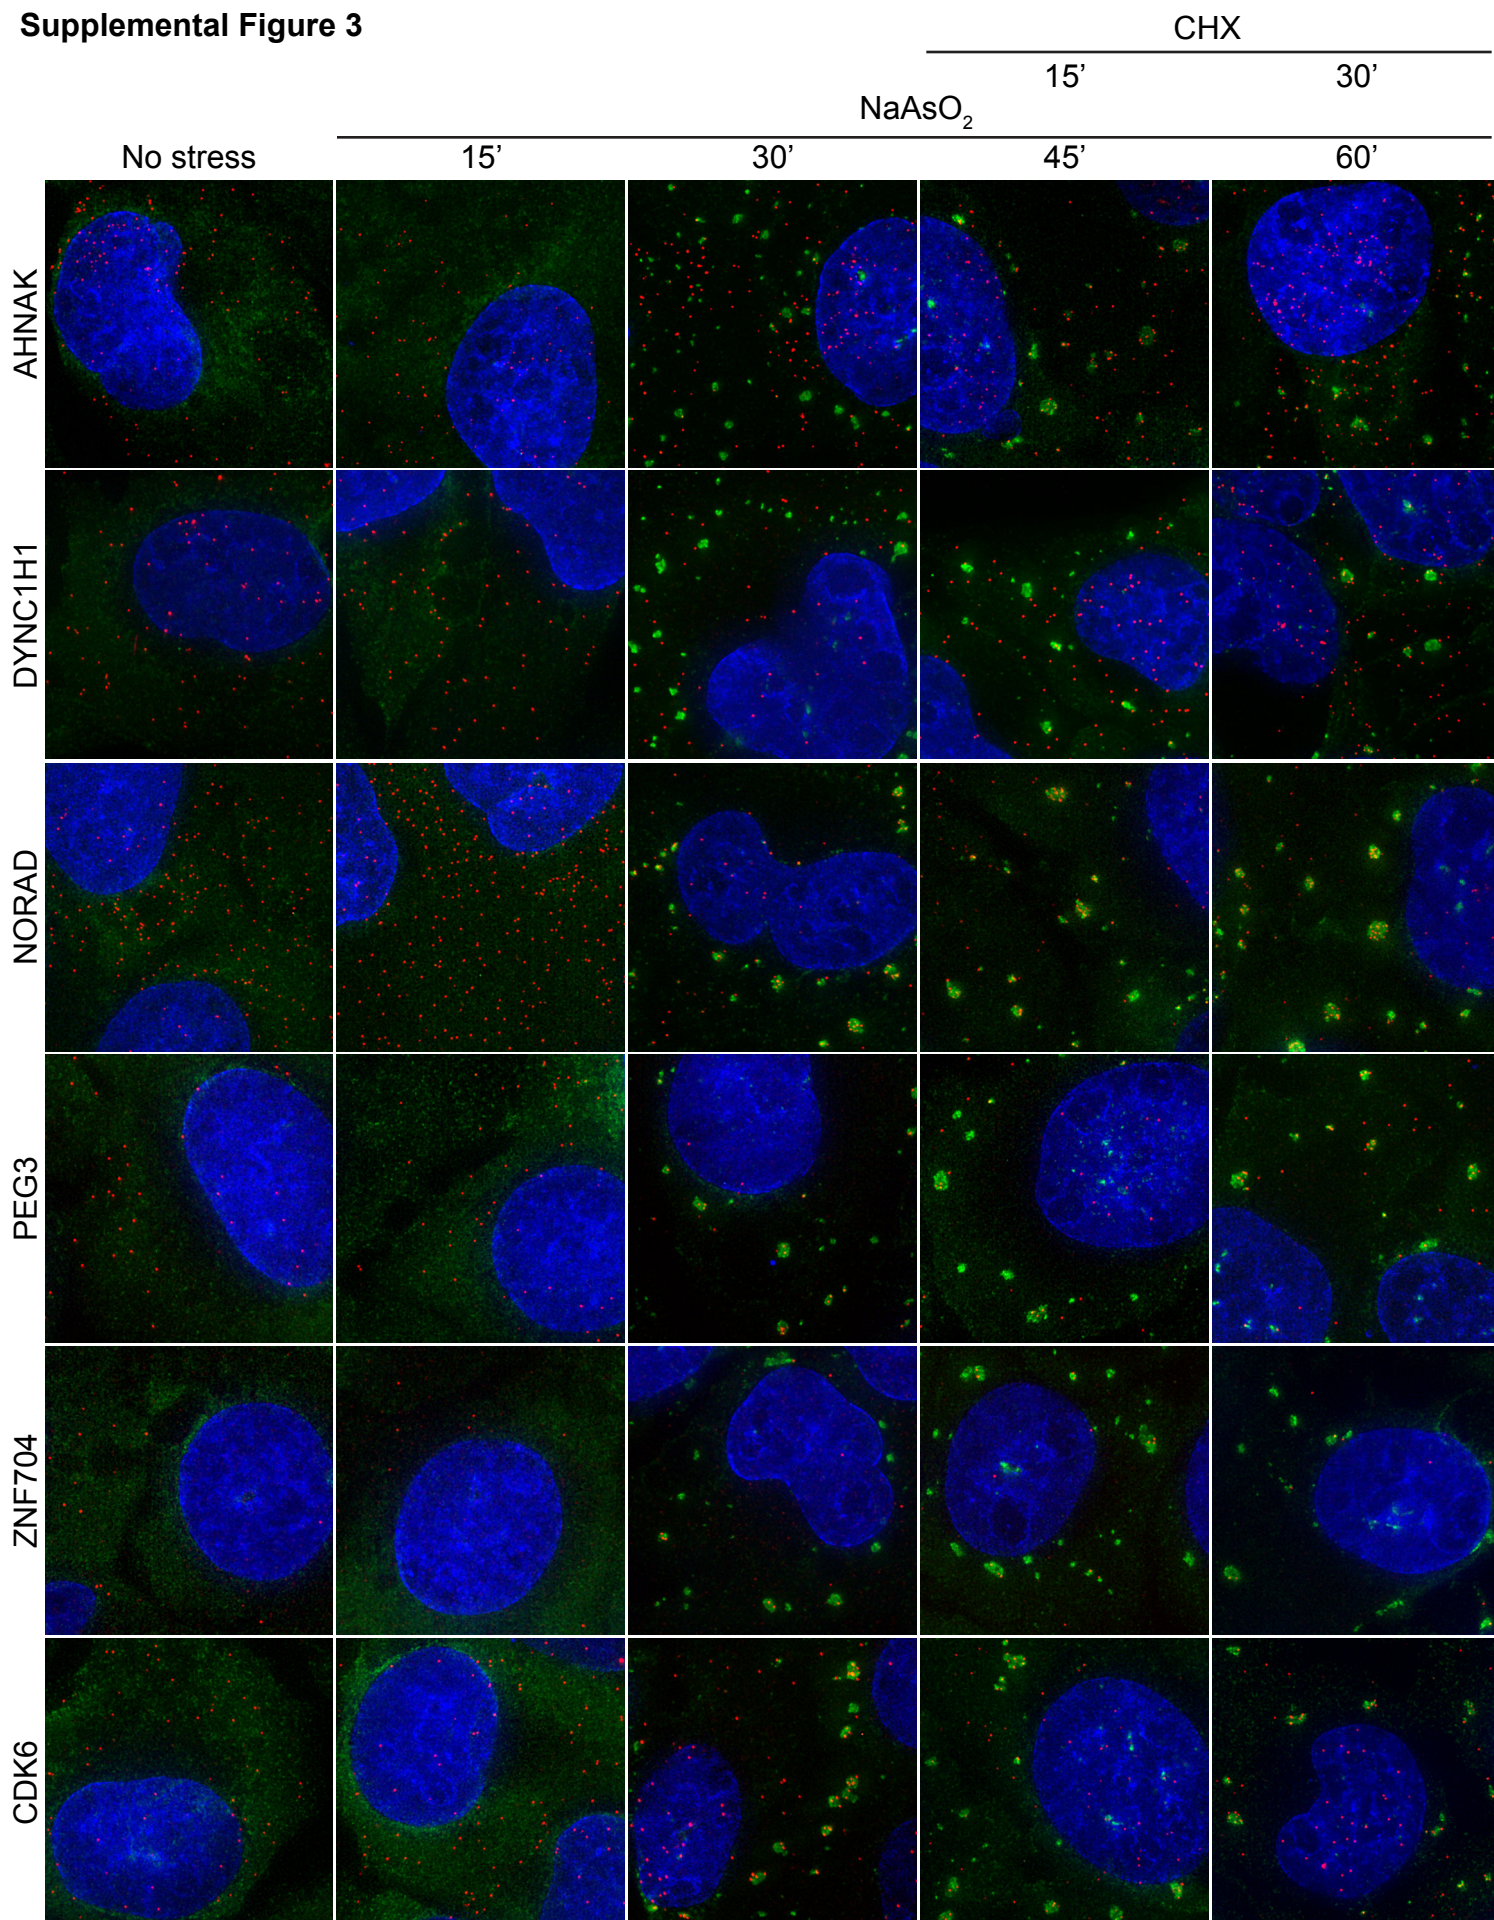



## Supplemental Figure 4

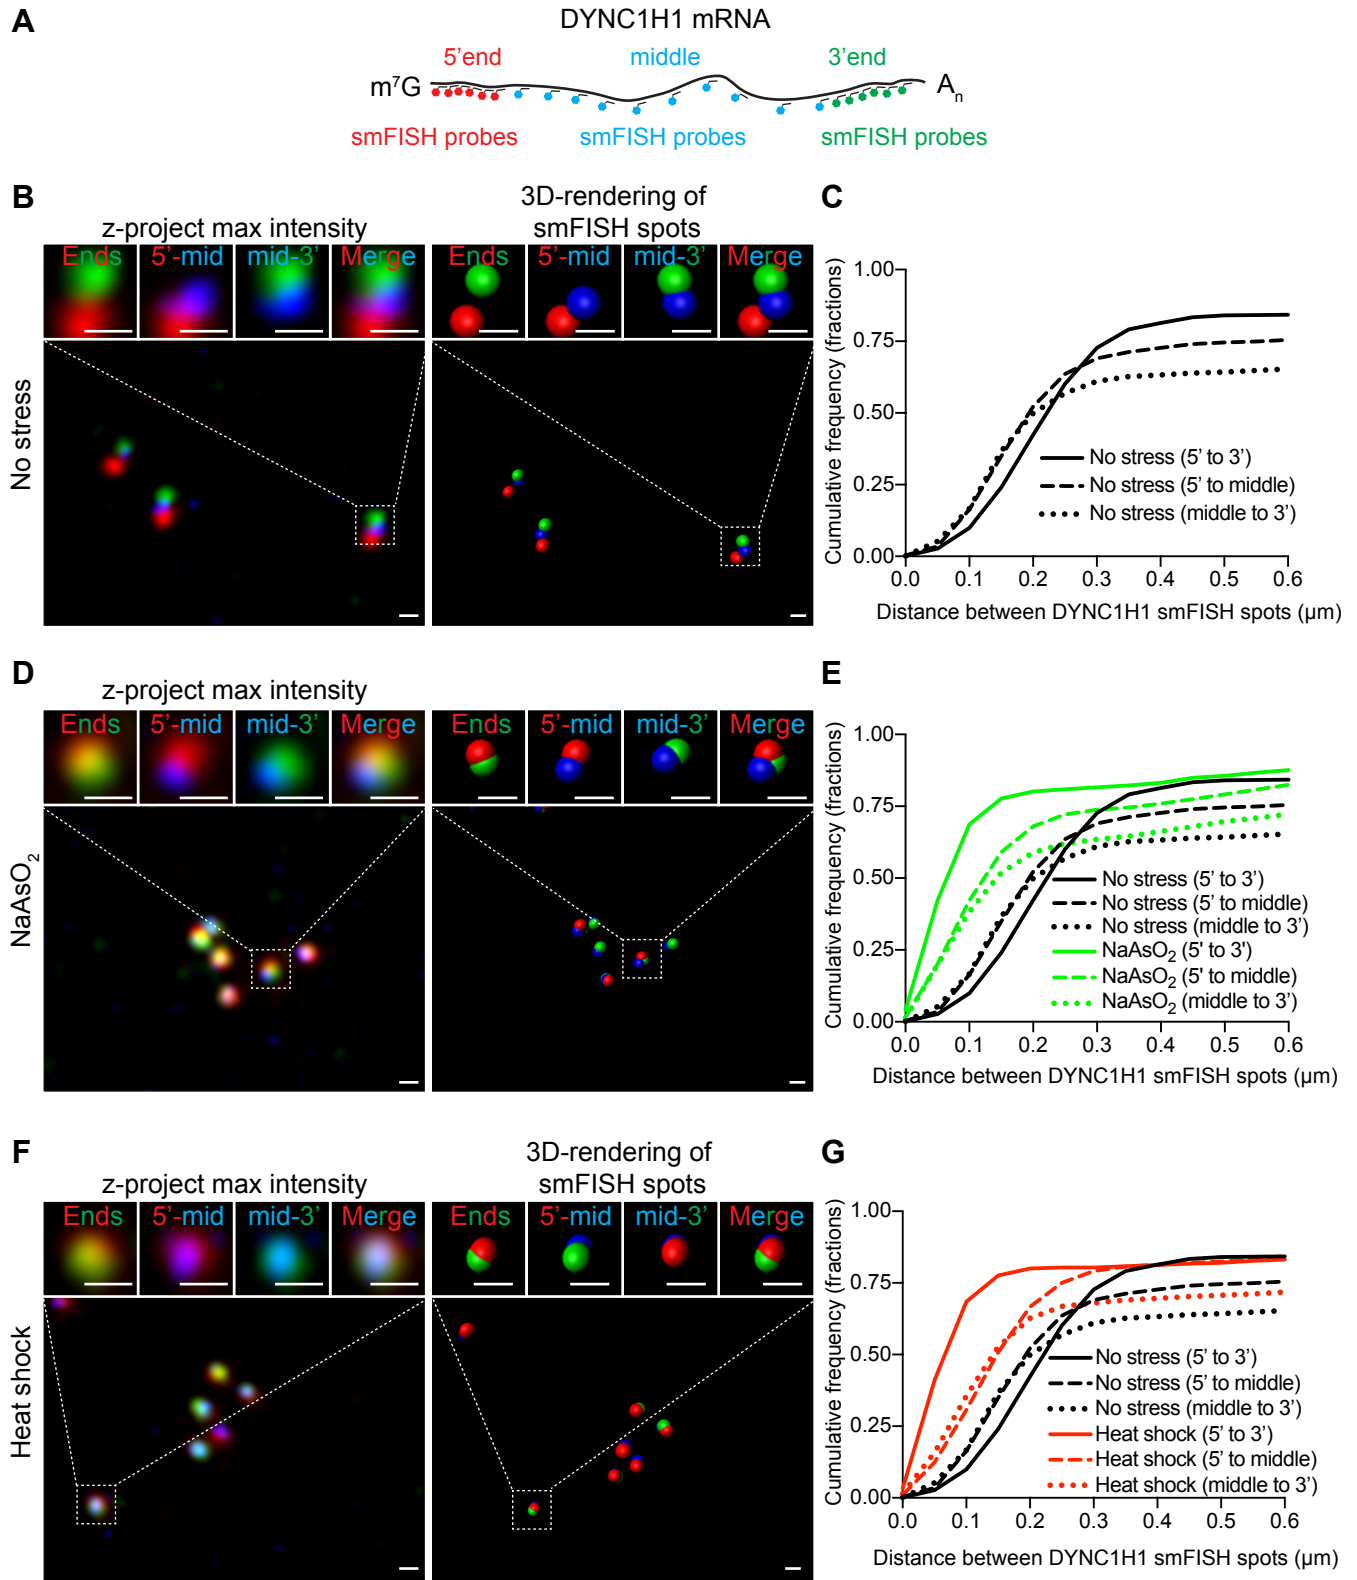

## Supplemental Figure 5

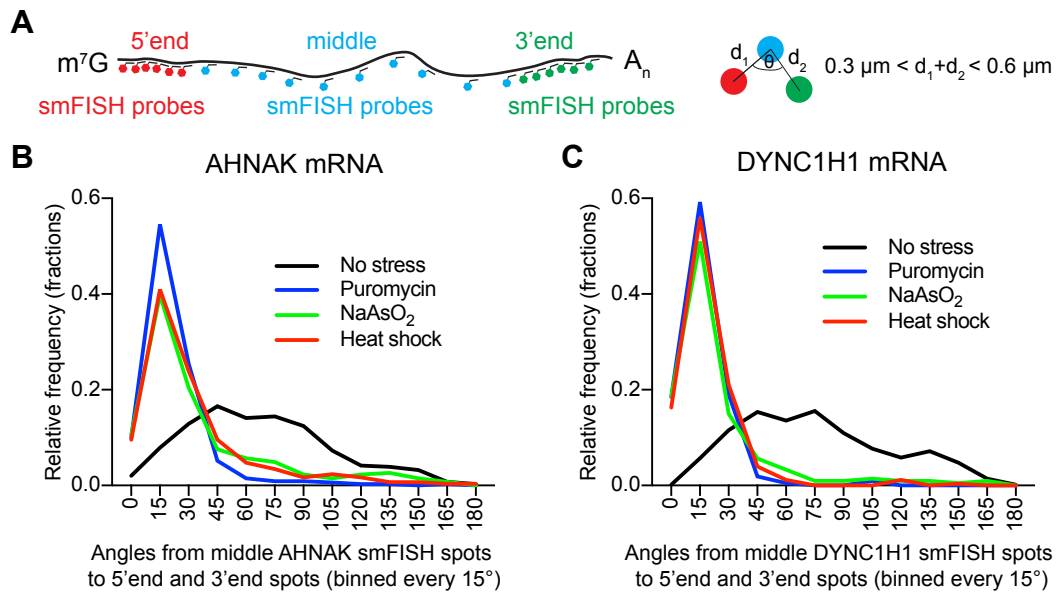

## Supplemental Figure 6

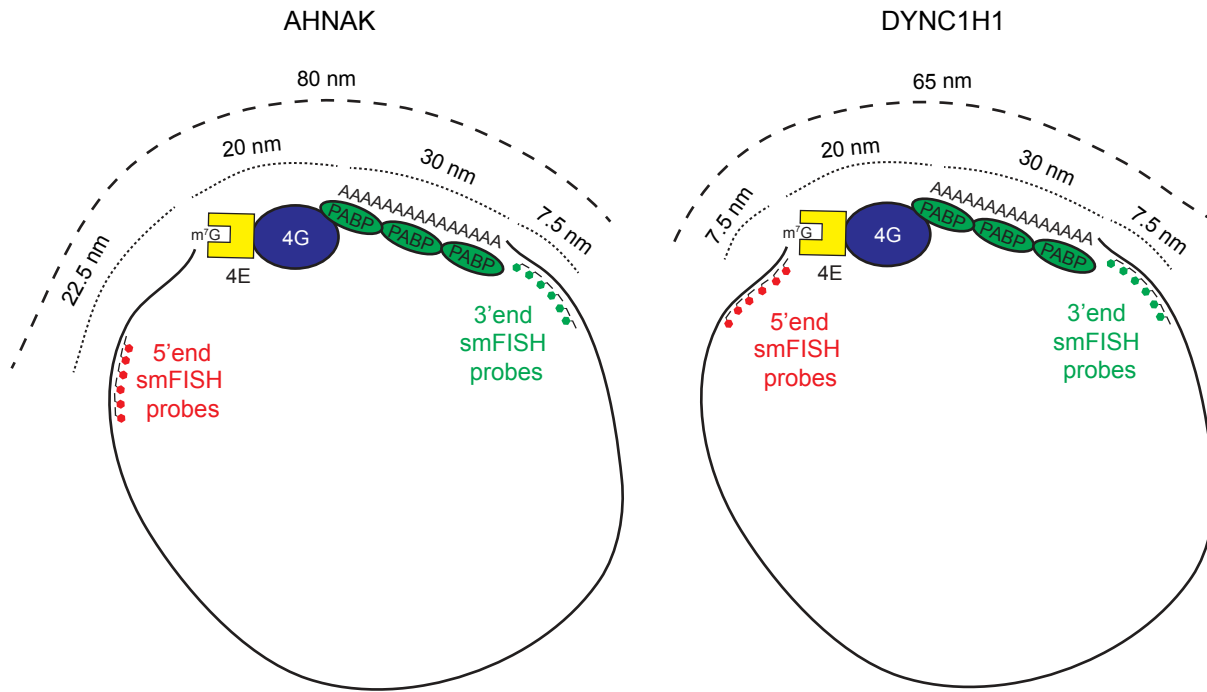

Source: https://www.biorxiv.org/content/10.1101/366690v1.full.pdf
